# Supplementary material for: Palladium-catalyzed selective synthesis of 3,4-dihydroquinazolines from electron-rich arylamines, electron-poor arylamines and glyoxalates
Source: Royal Society of Chemistry journal article supplement (doi:10.1039/c8ob01005f), 2018-01-01

# Palladium-catalyzed selective synthesis of 3,4-dihydroquinazolines from electron-rich arylamines, electron-poor arylamines and glyoxalates

Chao Wu<sup>a,c</sup>, Jie Wang<sup>a</sup>, Xing-Yu Zhang<sup>a</sup>, Guo-Kai Jia<sup>a</sup>, Zhong Cao<sup>c</sup>, Zilong Tang<sup>d</sup>, Xianyong Yu<sup>d</sup>,  
Xinhua Xu<sup>b</sup> and Wei-Min He<sup>\*a,b</sup>

<sup>a</sup>Department of Chemistry, Hunan University of Science and Engineering, Yongzhou 425100, China

<sup>b</sup>State Key Laboratory of Chemo/Biosensing and Chemometrics, Hunan University, Changsha, 410082, China

<sup>c</sup>Hunan Provincial Key Laboratory of Materials Protection for Electric Power and Transportation, Changsha University of Science and Technology, Changsha, 410114, China

<sup>d</sup>Key Laboratory of Theoretical Organic Chemistry and Functional Molecule of Ministry of Education, Hunan University of Science and Technology, Xiangtan 411201, China

## Contents

|                                                                     |     |
|---------------------------------------------------------------------|-----|
| 1. General information .....                                        | S2  |
| 2. Screening of reaction conditions.....                            | S3  |
| 3. General procedure.....                                           | S4  |
| 4. Characterization data of products <b>4a–5i</b> , <b>7b</b> ..... | S5  |
| 5. Copies of NMR spectra for <b>4a–5i</b> , <b>7b</b> .....         | S15 |

## 1. General information

Unless otherwise specified, all reagents and solvents were obtained from commercial suppliers and used without further purification. All reagents were weighed and handled in air at room temperature. Chromatographic purifications were carried out on a Biotage Isolera Four instrument.  $^1\text{H}$  NMR and  $^{13}\text{C}$  NMR spectra were obtained in  $\text{CDCl}_3$  with TMS as internal standard (600 MHz  $^1\text{H}$  and 150 MHz  $^{13}\text{C}$ ) at room temperature, the chemical shifts ( $\delta$ ) were expressed in ppm and  $J$  values were given in Hz. The following abbreviations are used to indicate the multiplicity: singlet (s), doublet (d), triplet (t), quartet (q), doublet of doublets (dd), doublet of triplets (dt), doublet of quartets (dq) and multiplet (m). All first order splitting patterns were assigned on the basis of the appearance of the multiplet. Splitting patterns that could not be easily interpreted were designated as multiplet (m). In a few cases the number of signals in the  $^{13}\text{C}$  NMR spectrum is than due, which may be caused by the superimposition of signals. HRMS data were obtained by ESI on a TOF mass analyzer.

### 3. Screening of reaction conditions

Table S1

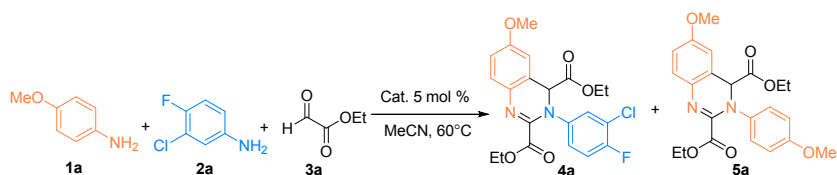

| Entry | Solvent              | Ligand | 4a(%) <sup>b</sup> | 5a(%) <sup>b</sup> |
|-------|----------------------|--------|--------------------|--------------------|
| 1     | FeCl <sub>3</sub>    | -      | 0                  | 0                  |
| 2     | ZnBr <sub>2</sub>    | -      | 0                  | 0                  |
| 3     | AgNO <sub>3</sub>    | -      | 0                  | 0                  |
| 4     | Cu(OTf) <sub>2</sub> | -      | 0                  | 0                  |
| 5     | PdCl <sub>2</sub>    | -      | 0                  | 0                  |
| 6     | CuBr <sub>2</sub>    | -      | 10                 | 12                 |
| 7     | Sc(OTf) <sub>3</sub> | -      | 8                  | 9                  |

<sup>a</sup> Reaction conditions: **1a** (0.6 mmol), **2a** (0.5 mmol), **3a** (1.2 mmol), 5 mol% catalyst, MeCN (2 mL), 60°C, 24h; <sup>b</sup> Isolated yields.

Table S2

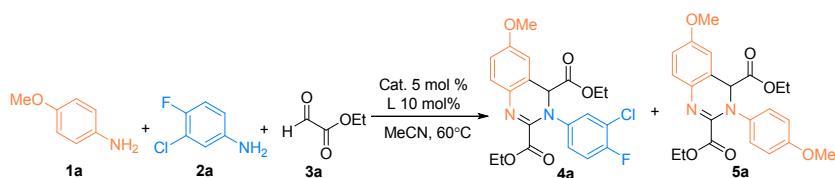

| Entry | Solvent | T(°C) | 4a(%) <sup>b</sup> | 5a(%) <sup>b</sup> |
|-------|---------|-------|--------------------|--------------------|
| 1     | MeCN    | r.t.  | 0                  | 0                  |
| 2     | MeCN    | 40    | 10                 | Trace              |
| 3     | MeCN    | 60    | 68                 | 14                 |
| 4     | MeCN    | 80    | 38                 | 23                 |
| 5     | MeCN    | 60    | 36                 | 12 <sup>c</sup>    |
| 6     | MeCN    | 60    | 60                 | 16 <sup>d</sup>    |
| 7     | MeCN    | 60    | 44                 | 13 <sup>e</sup>    |
| 8     | MeCN    | 60    | 64                 | 16 <sup>f</sup>    |

|    |             |    |       |                 |
|----|-------------|----|-------|-----------------|
| 9  | MeCN        | 60 | 46    | 17 <sup>g</sup> |
| 10 | THF         | 60 | 0     | 0               |
| 11 | Toluene     | 60 | 14    | 18              |
| 12 | DMSO        | 60 | 33    | 15              |
| 13 | DCE         | 60 | Trace | Trace           |
| 14 | 1,4-dioxane | 60 | Trace | Trace           |

<sup>a</sup> Reaction conditions: **1a** (0.6 mmol), **2a** (0.5 mmol), **3a** (1.2 mmol), 5 mol% PdCl<sub>2</sub>, 10 mol% 4-nitrothiophenol, MeCN (2 mL), 60°C, 24h; <sup>b</sup> Isolated yields; <sup>c</sup> 5 mol % 4-nitrothiophenol; <sup>d</sup> 10 mol % PdCl<sub>2</sub>, 20 mol % 4-nitrothiophenol; <sup>e</sup> **1a** (0.5 mmol), **2a** (0.5 mmol), **3a** (1.2 mmol), 24h; <sup>f</sup> **1a** (0.7 mmol), **2a** (0.5 mmol), **3a** (1.3 mmol); <sup>g</sup> **1a** (0.5 mmol), **2a** (0.6 mmol), **3a** (1.2 mmol).

## 4. General procedure

### 3.1 Palladium-catalyzed synthesis of 3,4-dihydroquinazolines from electron-rich arylamines, electron-poor arylamines and glyoxalates

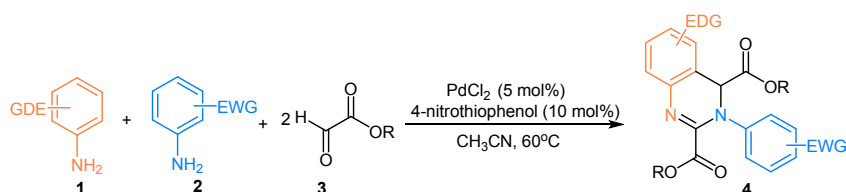

To a mixture of electron-rich arylamine **1** (0.6 mmol), electron-poor arylamine **2** (0.5 mmol), glyoxalate **3** (1.2 mmol), PdCl<sub>2</sub> (5 mol%), and 4-nitrothiophenol (10 mol %) in a 25 mL round-bottomed flask at room temperature, was added CH<sub>3</sub>CN (2 mL). The reaction vessel was allowed to stir at 60°C for 24-36h. After the reaction, the solvent was then removed under vacuum. The residue was purified by flash column chromatography using a mixture of petroleum ether and ethyl acetate as eluent to give the desired product **4**.

### 3.2 Palladium-catalyzed synthesis of 3,4-dihydroquinazolines from arylamines and glyoxalates

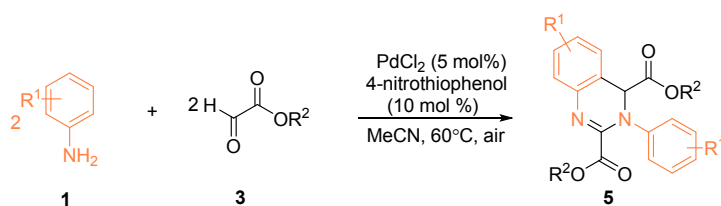

To a mixture of arylamine **1** (0.5 mmol), glyoxalate **3** (1.2 mmol), PdCl<sub>2</sub> (5 mol%), and 4-nitrothiophenol (10 mol %) in a 25 mL round-bottomed flask at room temperature, was added CH<sub>3</sub>CN (2 ml). The reaction vessel was allowed to stir at 60°C for 24-36h. After the reaction, the solvent was then removed under vacuum. The residue was purified by flash column chromatography using a mixture of petroleum ether and ethyl acetate as eluent to give the desired product **5**.

#### 4. Characterization data of products (4a-5i, 7b)

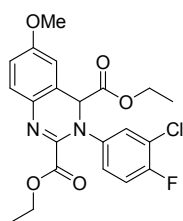

**4a**, reaction time 24h, <sup>1</sup>H NMR (600 MHz, CDCl<sub>3</sub>): δ = 1.15 (t, *J* = 7.1 Hz, 3H), 1.24 (t, *J* = 7.1 Hz, 3H), 3.81 (s, 3H), 4.17-4.30 (m, 4H), 5.28 (s, 1H), 6.76 (d, *J* = 2.7 Hz, 1H), 6.91 (dd, *J* = 2.8, 8.7 Hz, 1H), 6.97-6.99 (m, 1H), 7.12 (t, *J* = 8.6 Hz, 1H), 7.19 (dd, *J* = 2.8, 6.2 Hz, 1H), 7.40 (d, *J* = 8.7 Hz, 1H); <sup>13</sup>C NMR (150 MHz, CDCl<sub>3</sub>): δ = 13.8, 14.0, 55.6, 62.30, 62.33, 63.5, 111.7, 115.1, 117.0 (d, *J*<sub>C-F</sub> = 22.3 Hz), 121.6, 121.8 (d, *J*<sub>C-F</sub> = 18.7 Hz), 122.9 (d, *J*<sub>C-F</sub> = 7.1 Hz), 125.4, 127.6, 133.2, 140.6, 144.3, 156.2 (d, *J*<sub>C-F</sub> = 247.8 Hz), 159.3, 161.9, 169.3; HRMS calculated for C<sub>21</sub>H<sub>20</sub>ClFN<sub>2</sub>NaO<sub>5</sub>(ESI), 457.0942; found, 457.0937.

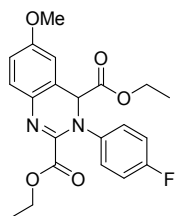

**4b**, reaction time 24h, <sup>1</sup>H NMR (600 MHz, CDCl<sub>3</sub>): δ = 1.06 (t, *J* = 7.1 Hz, 3H), 1.22 (t, *J* = 7.1 Hz, 3H), 3.80 (s, 3H), 4.11-4.26 (m, 4H), 5.29 (s, 1H), 6.74 (d, *J* = 2.5 Hz, 1H), 6.88 (dd, *J* = 2.6, 8.7 Hz, 1H), 7.03 (t, *J* = 8.5 Hz, 2H), 7.09 (dd, *J* = 4.6, 8.8 Hz, 2H), 7.37 (d, *J* = 8.8 Hz, 1H); <sup>13</sup>C NMR (150 MHz, CDCl<sub>3</sub>): δ = 13.7, 14.1, 55.6, 62.2,

63.6, 111.6, 115.1, 116.3 (d,  $J_{C-F} = 22.6$  Hz), 121.4, 124.9 (d,  $J_{C-F} = 8.2$  Hz), 127.5, 133.3, 140.0, 145.0, 159.0, 160.8 (d,  $J_{C-F} = 239.1$  Hz), 162.2, 169.7; HRMS calculated for  $C_{21}H_{22}FN_2O_5$  (ESI): 401.1519; found, 401.1507.

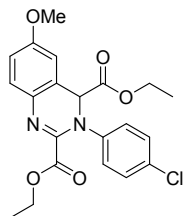

**4c**, reaction time 24h,  $^1H$  NMR (600 MHz,  $CDCl_3$ ):  $\delta = 1.10$  (t,  $J = 7.1$  Hz, 3H), 1.23 (t,  $J = 7.1$  Hz, 3H), 3.81 (s, 3H), 4.14-4.26 (m, 4H), 5.29 (s, 1H), 6.76 (s, 1H), 6.90 (d,  $J = 8.6$  Hz, 1H), 7.01 (d,  $J = 8.4$  Hz, 2H), 7.31 (d,  $J = 8.4$  Hz, 2H), 7.40 (d,  $J = 8.7$  Hz, 1H);  $^{13}C$  NMR (150 MHz,  $CDCl_3$ ):  $\delta = 13.7, 14.0, 55.6, 62.19, 62.23, 63.3, 111.7, 115.1, 121.7, 123.9, 127.6, 129.5, 131.6, 133.3, 142.5, 144.5, 159.2, 162.1, 169.5$ ; HRMS calculated for  $C_{21}H_{21}ClN_2NaO_5$ (ESI): 439.1037; found, 439.1031.

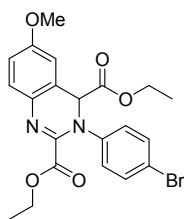

**4d**, reaction time 24h,  $^1H$  NMR (600 MHz,  $CDCl_3$ ):  $\delta = 1.10$  (t,  $J = 7.1$  Hz, 3H), 1.22 (t,  $J = 7.1$  Hz, 3H), 3.80 (s, 3H), 4.13-4.27 (m, 4H), 5.28 (s, 1H), 6.76 (d,  $J = 2.6$  Hz, 1H), 6.90 (dd,  $J = 2.6, 8.8$  Hz, 1H), 6.94 (d,  $J = 8.4$  Hz, 2H), 7.40 (d,  $J = 8.7$  Hz, 1H), 7.46 (d,  $J = 8.5$  Hz, 2H);  $^{13}C$  NMR (150 MHz,  $CDCl_3$ ):  $\delta = 13.7, 14.1, 55.6, 62.28, 62.35, 63.1, 111.7, 115.1, 119.2, 121.8, 123.9, 127.6, 132.4, 133.2, 142.9, 144.4, 159.2, 162.1, 169.6$ ; HRMS calculated for  $C_{21}H_{21}BrN_2NaO_5$  (ESI): 483.0512; found, 483.0526.

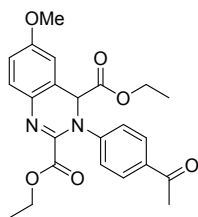

**4e**, reaction time 36h,  $^1H$  NMR (600 MHz,  $CDCl_3$ ):  $\delta = 1.12$  (t,  $J = 7.1$  Hz, 3H), 1.23 (t,  $J = 7.1$  Hz, 3H), 2.57 (s, 3H), 3.81 (s, 3H), 4.11-4.29 (m, 4H), 5.34 (s, 1H), 6.79 (d,  $J = 2.6$  Hz, 1H), 6.91 (dd,  $J = 2.7, 8.7$  Hz, 1H), 7.07 (d,  $J = 8.6$  Hz, 2H), 7.44

(d,  $J = 8.7$  Hz, 1H), 7.95 (d,  $J = 8.6$  Hz, 2H);  $^{13}\text{C}$  NMR (150 MHz,  $\text{CDCl}_3$ ):  $\delta = 13.7, 14.0, 26.5, 55.6, 62.3, 62.4, 62.7, 111.9, 115.2, 120.9, 122.3, 127.8, 129.8, 133.1, 133.8, 143.9, 147.7, 159.5, 162.0, 169.3, 196.5$ ; HRMS calculated for  $\text{C}_{23}\text{H}_{24}\text{N}_2\text{NaO}_6$  (ESI): 447.1505; found, 447.1527.

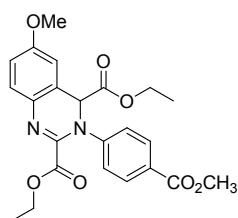

**4f**, reaction time 36h,  $^1\text{H}$  NMR (600 MHz,  $\text{CDCl}_3$ ):  $\delta = 1.09$  (t,  $J = 7.1$  Hz, 3H), 1.23 (t,  $J = 7.1$  Hz, 3H), 3.82 (s, 3H), 3.91 (s, 3H), 4.13-4.28 (m, 4H), 5.34 (s, 1H), 6.79 (d,  $J = 2.6$  Hz, 1H), 6.91 (dd,  $J = 2.8, 8.7$  Hz, 1H), 7.05 (d,  $J = 8.5$  Hz, 2H), 7.44 (d,  $J = 8.8$  Hz, 1H), 8.02 (d,  $J = 8.6$  Hz, 2H);  $^{13}\text{C}$  NMR (150 MHz,  $\text{CDCl}_3$ ):  $\delta = 13.7, 14.0, 52.2, 55.6, 62.28, 62.35, 62.7, 111.8, 115.2, 120.8, 122.3, 126.8, 127.8, 130.9, 133.2, 144.0, 147.7, 159.4, 162.1, 166.2, 169.4$ ; HRMS calculated for  $\text{C}_{23}\text{H}_{24}\text{N}_2\text{NaO}_7$  (ESI): 463.1457; found, 463.1476.

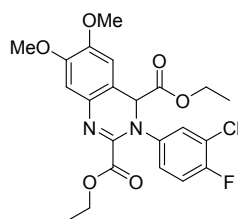

**4g**, reaction time 24h,  $^1\text{H}$  NMR (600 MHz,  $\text{CDCl}_3$ ):  $\delta = 1.14$  (t,  $J = 7.1$  Hz, 3H), 1.24 (t,  $J = 7.1$  Hz, 3H), 3.87 (s, 3H), 3.88 (s, 3H), 4.16-4.27 (m, 4H), 5.26 (s, 1H), 6.70 (s, 1H), 6.98-7.00 (m, 1H), 7.01 (s, 1H), 7.12 (t,  $J = 8.6$  Hz, 1H), 7.19 (dd,  $J = 2.7, 6.1$  Hz, 1H);  $^{13}\text{C}$  NMR (150 MHz,  $\text{CDCl}_3$ ):  $\delta = 13.8, 14.1, 56.0, 56.2, 62.2, 62.4, 63.2, 108.8, 109.3, 111.9, 117.1$  (d,  $J_{\text{C-F}} = 22.3$  Hz), 121.8 (d,  $J_{\text{C-F}} = 18.5$  Hz), 123.0 (d,  $J_{\text{C-F}} = 7.1$  Hz), 125.6, 133.3, 140.6, 144.8, 149.9, 156.3 (d,  $J_{\text{C-F}} = 248.2$  Hz), 161.8, 169.5; HRMS calculated for  $\text{C}_{22}\text{H}_{23}\text{ClFN}_2\text{O}_6$  (ESI): 465.1219; found, 465.1223.

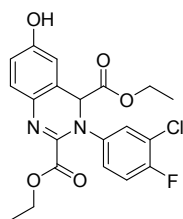

**4h**, reaction time 24h,  $^1\text{H}$  NMR (600 MHz,  $(\text{CD}_3)_2\text{CO}$ ):  $\delta = 1.09$  (t,  $J = 7.1$

Hz, 3H), 1.20 (t,  $J = 7.1$  Hz, 3H), 4.09-4.20 (m, 4H), 5.59 (s, 1H), 6.80 (d,  $J = 2.6$  Hz, 1H), 6.85 (dd,  $J = 2.7, 8.5$  Hz, 1H), 7.14-7.18 (m, 2H), 7.33-7.36 (m, 2H), 8.70 (brs, 1H);  $^{13}\text{C}$  NMR (150 MHz,  $[\text{D}_6]$ -Acetone):  $\delta = 13.1, 13.4, 61.4, 61.6, 62.6, 113.4, 116.3, 117.1$  (d,  $J_{\text{C-F}} = 22.3$  Hz), 120.6 (d,  $J_{\text{C-F}} = 18.7$  Hz), 122.2, 124.0 (d,  $J_{\text{C-F}} = 7.3$  Hz), 125.5, 126.9, 132.4, 140.9, 144.0, 155.9 (d,  $J_{\text{C-F}} = 244.9$  Hz), 157.2, 161.8, 169.4; HRMS calculated for  $\text{C}_{20}\text{H}_{18}\text{ClFN}_2\text{NaO}_5$  (ESI): 443.0776; found, 443.0780.

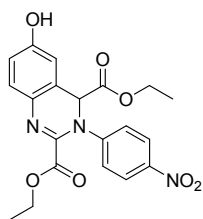

**4i**, reaction time 24h,  $^1\text{H}$  NMR (600 MHz,  $(\text{CD}_3)_2\text{CO}$ ):  $\delta = 1.13$  (t,  $J = 7.1$  Hz, 3H), 1.21 (t,  $J = 7.1$  Hz, 3H), 4.13-4.23 (m, 4H), 5.71 (s, 1H), 6.87-6.90 (m, 2H), 7.24 (d,  $J = 8.5$  Hz, 1H), 7.26 (d,  $J = 9.1$  Hz, 2H), 8.27 (d,  $J = 9.1$  Hz, 2H), 8.93 (brs, 1H);  $^{13}\text{C}$  NMR (150 MHz,  $[\text{D}_6]$ -Acetone):  $\delta = 13.2, 13.4, 61.5, 61.7, 61.8, 113.7, 116.4, 121.0, 123.3, 124.8, 127.3, 132.3, 142.7, 144.0, 149.4, 157.7, 161.6, 169.0$ ; HRMS calculated for  $\text{C}_{20}\text{H}_{20}\text{N}_3\text{O}_7$  (ESI): 414.1294; found, 414.1296.

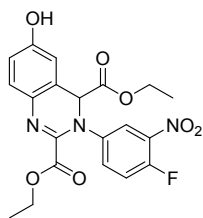

**4j**, reaction time 24h,  $^1\text{H}$  NMR (600 MHz,  $\text{CDCl}_3$ ):  $\delta = 1.14$  (t,  $J = 7.1$  Hz, 3H), 1.22 (t,  $J = 7.1$  Hz, 3H), 2.61 (s, 1H), 4.17-4.22 (m, 4H), 5.27 (s, 1H), 6.76 (d,  $J = 2.5$  Hz, 1H), 6.83 (dd,  $J = 2.6, 8.6$  Hz, 1H), 7.26-7.30 (m, 2H), 7.35-7.37 (m, 1H), 7.79 (dd,  $J = 2.8, 6.0$  Hz, 1H);  $^{13}\text{C}$  NMR (150 MHz,  $\text{CDCl}_3$ ):  $\delta = 13.7, 14.0, 62.7, 62.9, 63.2, 113.6, 117.2, 119.4$  (d,  $J_{\text{C-F}} = 21.9$  Hz), 120.2,, 121.8, 127.4, 129.8 (d,  $J_{\text{C-F}} = 8.1$  Hz), 131.8, 137.3 (d,  $J_{\text{C-F}} = 8.3$  Hz), 140.3, 143.4, 153.2 (d,  $J_{\text{C-F}} = 264.4$  Hz), 157.0, 161.3, 169.1; HRMS calculated for  $\text{C}_{20}\text{H}_{19}\text{FN}_3\text{O}_7$ (ESI): 432.1201; found, 432.1202.



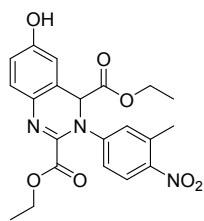

**4k**, reaction time 36h,  $^1\text{H}$  NMR (600 MHz,  $\text{CDCl}_3$ ):  $\delta$  = 1.14 (t,  $J$  = 7.1 Hz, 3H), 1.23 (t,  $J$  = 7.1 Hz, 3H), 2.61 (s, 1H), 4.17-4.30 (m, 4H), 5.30 (s, 1H), 6.78 (d,  $J$  = 2.5 Hz, 1H), 6.84 (dd,  $J$  = 2.6, 8.5 Hz, 1H), 6.91 (s, 1H), 6.94 (dd,  $J$  = 2.2, 8.8 Hz, 1H), 7.34 (d,  $J$  = 8.6 Hz, 1H), 8.05 (d,  $J$  = 8.8 Hz, 1H);  $^{13}\text{C}$  NMR (150 MHz,  $\text{CDCl}_3$ ):  $\delta$  = 13.7, 14.0, 21.2, 62.4, 62.6, 62.7, 113.5, 117.0, 119.0, 122.5, 124.5, 126.6, 127.7, 132.3, 136.1, 143.4, 145.4, 147.5, 156.7, 161.6, 169.1; HRMS calculated for  $\text{C}_{21}\text{H}_{21}\text{ClFN}_3\text{NaO}_7$ (ESI): 450.1268; found, 450.1272.

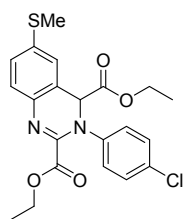

**4l**, reaction time 36h,  $^1\text{H}$  NMR (600 MHz,  $\text{CDCl}_3$ ):  $\delta$  = 1.09 (t,  $J$  = 7.1 Hz, 3H), 1.23 (t,  $J$  = 7.1 Hz, 3H), 2.48 (s, 3H), 4.13-4.27 (m, 4H), 5.29 (s, 1H), 7.03 (d,  $J$  = 8.6 Hz, 2H), 7.09 (s, 1H), 7.22 (d,  $J$  = 8.3 Hz, 1H), 7.32 (d,  $J$  = 8.6 Hz, 2H), 7.36 (d,  $J$  = 8.3 Hz, 1H);  $^{13}\text{C}$  NMR (150 MHz,  $\text{CDCl}_3$ ):  $\delta$  = 13.7, 14.0, 16.0, 62.29, 62.33, 63.2, 121.1, 124.2, 124.3, 126.6, 127.6, 129.5, 132.0, 137.1, 138.2, 142.2, 145.8, 162.0, 169.3; HRMS calculated for  $\text{C}_{21}\text{H}_{22}\text{ClN}_2\text{O}_4\text{S}$ (ESI): 433.0991; found, 433.0983.

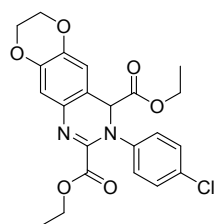

**4m**, reaction time 24h,  $^1\text{H}$  NMR (600 MHz,  $\text{CDCl}_3$ ):  $\delta$  = 1.09 (t,  $J$  = 7.1 Hz, 3H), 1.24 (t,  $J$  = 7.1 Hz, 3H), 4.13-4.28 (m, 8H), 5.21 (s, 1H), 6.74 (s, 1H), 6.99-7.01 (m, 3H), 7.31 (dd,  $J$  = 1.9, 6.8 Hz, 2H);  $^{13}\text{C}$  NMR (150 MHz,  $\text{CDCl}_3$ ):  $\delta$  = 13.7, 14.0, 62.1, 62.2, 62.7, 64.3, 64.4, 113.9, 114.71, 114.73, 124.0, 129.5, 131.7, 133.9, 142.4, 143.3, 144.3, 145.2, 162.1, 169.7; HRMS calculated for  $\text{C}_{22}\text{H}_{21}\text{ClN}_2\text{NaO}_6$ (ESI): 467.0988; found, 467.0980.

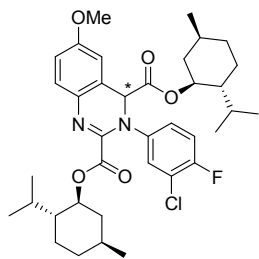

**4n**, reaction time 36h, (isomers mixture);  $^1\text{H}$  NMR (600 MHz,  $\text{CDCl}_3$ ):  $\delta$  = 0.54 (d,  $J$  = 6.9 Hz, 6H), 0.59 (d,  $J$  = 6.9 Hz, 3H), 0.70-0.74 (m, 10H), 0.77-0.79 (m, 5H), 0.83 (d,  $J$  = 6.6 Hz, 6H), 0.85-0.89 (m, 17H), 0.91-1.06 (m, 10H), 1.24-1.28 (m, 3H), 1.30-1.37 (m, 4H), 1.40-1.45 (m, 5H), 1.56-1.59 (m, 2H), 1.62-1.67 (m, 9H), 1.72 (m, 3H), 1.80-1.85 (m, 1H), 1.89-1.91 (m, 2H), 2.01-2.03 (m, 2H), 3.788 (s, 3H), 3.79 (s, 3H), 4.62-4.74 (m, 4H), 5.22 (s, 1H), 5.25 (s, 1H), 6.70 (d,  $J$  = 2.6 Hz, 1H), 6.74 (d,  $J$  = 2.6 Hz, 1H), 6.86-6.89 (m, 2H), 6.99-7.00 (m, 2H), 7.08-7.12 (m, 2H), 7.18-7.20 (m, 2H), 7.34-7.40 (m, 2H);  $^{13}\text{C}$  NMR (150 MHz,  $\text{CDCl}_3$ ):  $\delta$  = 15.5, 15.7, 15.9, 16.0, 20.6, 20.8, 21.8, 21.9, 22.0, 22.77, 22.8, 23.1, 23.2, 25.3, 25.7, 25.91, 25.95, 31.2, 31.3, 31.4, 33.97, 34.0, 34.07, 34.1, 39.8, 40.2, 40.5, 40.6, 46.61, 46.64, 47.0, 47.1, 55.5, 55.6, 63.6, 64.0, 111.0, 111.6, 115.1, 115.2, 116.9 (d,  $J_{\text{C-F}}$  = 22.3 Hz), 117.2 (d,  $J_{\text{C-F}}$  = 22.2 Hz), 121.57, 121.6, 121.7 (d,  $J_{\text{C-F}}$  = 18.8 Hz), 122.1 (d,  $J_{\text{C-F}}$  = 18.8 Hz), 122.7 (d,  $J_{\text{C-F}}$  = 6.7 Hz), 123.3 (d,  $J_{\text{C-F}}$  = 6.8 Hz), 125.2, 125.9, 127.6, 127.9, 133.2, 133.4, 140.6, 140.8, 144.6, 144.7, 156.2 (d,  $J_{\text{C-F}}$  = 237.7 Hz), 156.4 (d,  $J_{\text{C-F}}$  = 248.0 Hz), 159.1, 161.7, 162.3, 169.0, 169.1; HRMS calcd for  $\text{C}_{37}\text{H}_{48}\text{ClFN}_2\text{NaO}_5$ : 677.3139; found, 677.3128.

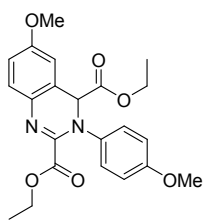

**5a**, reaction time 24h,  $^1\text{H}$  NMR (600 MHz,  $\text{CDCl}_3$ ):  $\delta$  = 1.06 (t,  $J$  = 7.1 Hz, 3H), 1.23 (t,  $J$  = 7.1 Hz, 3H), 3.79 (s, 3H), 3.80 (s, 3H), 4.10-4.27 (m, 4H), 5.31 (s, 1H), 6.74 (d,  $J$  = 2.7 Hz, 1H), 6.85-6.89 (m, 3H), 7.07 (d,  $J$  = 8.8 Hz, 2H), 7.36 (d,  $J$  = 8.8 Hz, 1H);  $^{13}\text{C}$  NMR (150 MHz,  $\text{CDCl}_3$ ):  $\delta$  = 13.7, 14.0, 55.51, 55.56, 61.92, 61.98, 64.0, 111.5, 114.5, 115.0, 121.2, 125.3, 127.3, 133.6, 136.7, 145.8, 158.2, 158.7, 162.5, 169.8; HRMS calculated for  $\text{C}_{22}\text{H}_{25}\text{N}_2\text{O}_6$ (ESI): 413.1708; found, 413.1713.

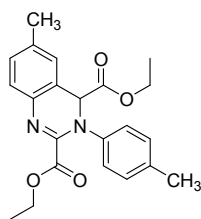

**5b**, reaction time 24h,  $^1\text{H}$  NMR (600 MHz,  $\text{CDCl}_3$ ):  $\delta$  = 1.06 (t,  $J$  = 7.1 Hz, 3H), 1.22 (t,  $J$  = 7.1 Hz, 3H), 2.33 (s, 3H), 2.34 (s, 3H), 4.10-4.27 (m, 4H), 5.31 (s, 1H), 6.99 (d,  $J$  = 8.2 Hz, 2H), 7.02 (s, 1H), 7.14 (d,  $J$  = 8.1 Hz, 3H), 7.32 (d,  $J$  = 8.0 Hz, 1H);  $^{13}\text{C}$  NMR (150 MHz,  $\text{CDCl}_3$ ):  $\delta$  = 13.6, 14.0, 20.9, 21.1, 61.9, 62.0, 63.5, 120.3, 123.0, 125.9, 126.8, 129.9, 130.3, 136.2, 137.2, 137.6, 141.2, 146.6, 162.5, 170.0; HRMS calculated for  $\text{C}_{22}\text{H}_{25}\text{N}_2\text{O}_4$ (ESI): 381.1818; found, 381.1814.

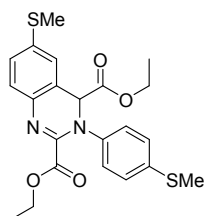

**5c**, reaction time 24h,  $^1\text{H}$  NMR (600 MHz,  $\text{CDCl}_3$ ):  $\delta$  = 1.08 (t,  $J$  = 7.1 Hz, 3H), 1.23 (t,  $J$  = 7.1 Hz, 3H), 2.47 (s, 3H), 2.48 (s, 3H), 4.11-4.28 (m, 4H), 5.30 (s, 1H), 7.03 (d,  $J$  = 8.6 Hz, 2H), 7.10 (d,  $J$  = 2.0 Hz, 1H), 7.22 (d,  $J$  = 8.7 Hz, 3H), 7.36 (d,  $J$  = 8.4 Hz, 1H);  $^{13}\text{C}$  NMR (150 MHz,  $\text{CDCl}_3$ ):  $\delta$  = 13.7, 14.0, 16.1, 62.2, 63.3, 121.0, 123.6, 124.3, 126.5, 127.6, 127.65, 137.0, 137.4, 137.8, 140.8, 146.3, 162.2, 169.5; HRMS calculated for  $\text{C}_{22}\text{H}_{25}\text{N}_2\text{O}_4\text{S}_2$  (ESI): 445.1260; found, 445.1256.

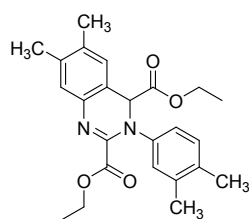

**5d**, reaction time 24h,  $^1\text{H}$  NMR (600 MHz,  $\text{CDCl}_3$ ):  $\delta$  = 1.07 (t,  $J$  = 7.1 Hz, 3H), 1.23 (t,  $J$  = 7.1 Hz, 3H), 2.22 (s, 3H), 2.23 (s, 3H), 2.24 (s, 3H), 2.25 (s, 3H), 4.11-4.26 (m, 4H), 5.30 (s, 1H), 6.82 (d,  $J$  = 8.0 Hz, 1H), 6.86 (s, 1H), 6.96 (s, 1H), 7.07 (d,  $J$  = 8.0 Hz, 1H), 7.21 (s, 1H);  $^{13}\text{C}$  NMR (150 MHz,  $\text{CDCl}_3$ ):  $\delta$  = 13.7, 14.0, 19.2, 19.4, 19.6, 19.8, 61.8, 61.9, 63.2, 117.8, 120.4, 124.2, 126.9, 127.2, 130.4, 134.8, 135.9, 137.7, 137.8, 138.0, 141.5, 146.7, 162.6, 170.2; HRMS calculated for  $\text{C}_{24}\text{H}_{29}\text{N}_2\text{O}_4$ (ESI): 409.2114; found, 409.2127.

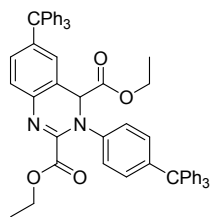

**5e**, reaction time 36h,  $^1\text{H}$  NMR (600 MHz,  $\text{CDCl}_3$ ):  $\delta$  = 0.96 (t,  $J$  = 7.1 Hz, 3H), 1.12 (t,  $J$  = 7.1 Hz, 3H), 4.07-4.15 (m, 4H), 5.23 (s, 1H), 6.94 (d,  $J$  = 8.7 Hz, 2H), 7.09 (d,  $J$  = 1.7 Hz, 1H), 7.16-7.25 (m, 33H), 7.31 (d,  $J$  = 8.4 Hz, 1H);  $^{13}\text{C}$  NMR (150 MHz,  $\text{CDCl}_3$ ):  $\delta$  = 13.6, 14.0, 61.9, 62.1, 62.9, 64.6, 64.8, 119.4, 121.6, 124.9, 126.1, 127.4, 127.57, 127.6, 129.4, 130.9, 131.1, 132.0, 132.2, 137.8, 141.2, 145.0, 146.1, 146.4, 146.5, 147.0, 162.6, 169.6; HRMS calculated for  $\text{C}_{58}\text{H}_{49}\text{N}_2\text{O}_4$ (ESI): 837.3669; found, 837.3692.

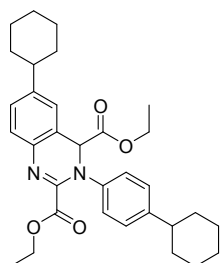

**5f**, reaction time 36h,  $^1\text{H}$  NMR (600 MHz,  $\text{CDCl}_3$ ):  $\delta$  = 0.95 (t,  $J$  = 7.1 Hz, 3H), 1.22 (t,  $J$  = 7.1 Hz, 3H), 1.25-1.28 (m, 2H), 1.34-1.42 (m, 8H), 1.74 (d,  $J$  = 12.7 Hz, 2H), 1.83-1.86 (m, 8H), 2.48 (d,  $J$  = 7.7 Hz, 2H), 4.06-4.18 (m, 3H), 4.23-4.29 (m, 1H), 5.35 (s, 1H), 7.01 (d,  $J$  = 8.4 Hz, 2H), 7.04 (d,  $J$  = 1.6 Hz, 1H), 7.16-7.18 (m, 3H), 7.34 (d,  $J$  = 8.1 Hz, 1H);  $^{13}\text{C}$  NMR (150 MHz,  $\text{CDCl}_3$ ):  $\delta$  = 13.5, 14.0, 26.0, 26.1, 26.8, 34.3, 34.4, 34.5, 44.0, 44.2, 61.9, 63.5, 120.3, 122.9, 124.7, 125.8, 127.7, 128.0, 137.9, 141.4, 146.4, 146.6, 147.4, 162.6, 170.0; HRMS calculated for  $\text{C}_{32}\text{H}_{41}\text{N}_2\text{O}_4$ (ESI): 517.3072; found, 517.3066.

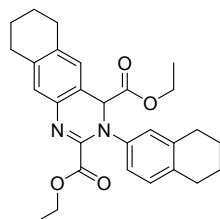

**5g**, reaction time 36h,  $^1\text{H}$  NMR (600 MHz,  $\text{CDCl}_3$ ):  $\delta$  = 1.08 (t,  $J$  = 7.1 Hz, 3H), 1.23 (t,  $J$  = 7.1 Hz, 3H), 1.75-1.77 (m, 8H), 2.70-2.76 (m, 8H), 4.11-4.27 (m, 4H), 5.28 (s, 1H), 6.76 (s, 1H), 6.80 (dd,  $J$  = 2.3, 8.1 Hz, 1H), 6.90 (s, 1H), 7.00 (d,  $J$  = 8.0 Hz, 1H), 7.13 (s, 1H);  $^{13}\text{C}$  NMR (150 MHz,  $\text{CDCl}_3$ ):  $\delta$  = 13.7, 14.0, 22.9, 22.96, 23.0,

23.1, 28.9, 29.19, 29.22, 29.4, 61.86, 61.9, 63.2, 118.0, 120.2, 123.3, 126.1, 126.7, 129.9, 135.4, 136.6, 137.4, 138.3, 138.5, 141.1, 146.6, 162.6, 170.3; HRMS calculated for  $C_{28}H_{32}N_2NaO_4$ (ESI): 483.2266; found, 483.2254.

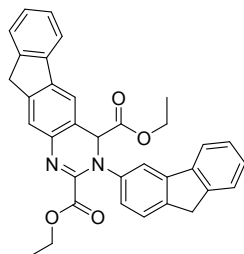

**5h**, reaction time 24h,  $^1H$  NMR (600 MHz,  $CDCl_3$ ):  $\delta$  = 1.04 (t,  $J$  = 7.1 Hz, 3H), 1.25 (t,  $J$  = 7.1 Hz, 3H), 3.90 (d,  $J$  = 3.7 Hz, 1H), 3.93 (s, 2H), 4.13-4.31 (m, 4H), 5.57 (s, 1H), 7.16 (dd,  $J$  = 2.0, 8.1 Hz, 1H), 7.29-7.40 (m, 5H), 7.54 (t,  $J$  = 6.4 Hz, 2H), 7.62 (s, 1H), 7.64 (s, 1H), 7.74-7.77 (m, 3H);  $^{13}C$  NMR (150 MHz,  $CDCl_3$ ):  $\delta$  = 13.7, 14.1, 36.9, 37.0, 62.12, 62.14, 64.1, 117.7, 119.6, 119.8, 119.9, 120.0, 120.4, 122.0, 122.7, 125.09, 125.11, 126.9, 127.0, 139.0, 140.1, 140.7, 140.9, 141.1, 142.4, 143.3, 143.6, 144.6, 144.7, 146.6, 162.6, 170.1; HRMS calculated for  $C_{34}H_{29}N_2O_4$  (ESI): 529.2128; found, 529.2127.

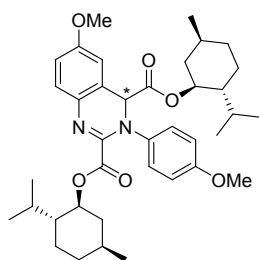

**5i**, reaction time 36h, (isomers mixture);  $^1H$  NMR (600 MHz,  $CDCl_3$ ):  $\delta$  = 0.48 (d,  $J$  = 7.0 Hz, 3H), 0.50 (d,  $J$  = 6.8 Hz, 3H), 0.59 (d,  $J$  = 6.9 Hz, 3H), 0.67-0.71 (m, 9H), 0.78-0.79 (m, 9H), 0.82-0.89 (18H), 0.92-1.05 (m, 8H), 1.30-1.38 (m, 6H), 1.40-1.46 (m, 3H), 1.51-1.64 (m, 6H), 1.76- 1.81 (m, 1H), 1.86-1.97 (m, 3H), 3.78-3.79 (m, 12H), 4.57-4.72 (m, 4H), 5.25 (s, 1H), 5.30 (s, 1H), 6.68 (d,  $J$  = 2.7 Hz, 1H), 6.72 (d,  $J$  = 2.7 Hz, 1H), 6.83-6.87 (m, 6H), 7.06-7.09 (m, 4H), 7.34-7.37 (m, 2H);  $^{13}C$  NMR (150 MHz,  $CDCl_3$ ):  $\delta$  = 15.5, 15.7, 15.9, 16.1, 20.6, 20.91, 20.93, 21.0, 21.91, 21.93, 22.0, 22.8, 23.0, 23.2, 24.9, 25.6, 25.7, 25.8, 31.2, 31.3, 31.4, 34.00, 34.07, 34.1, 34.2, 39.6, 40.2, 40.5, 40.6, 46.5, 46.6, 47.0, 47.1, 55.4, 55.5, 55.6, 64.1, 64.5, 110.7, 111.4, 114.5, 114.6, 115.0, 115.1, 121.3, 121.4, 124.9, 125.5, 127.2, 127.5,

133.7, 133.9, 136.7, 137.1, 146.1, 158.1, 158.3, 158.5, 162.4, 162.9, 169.5, 169.6;  
HRMS calculated for C<sub>38</sub>H<sub>53</sub>N<sub>2</sub>O<sub>6</sub> (ESI): 633.3909; found, 633.3904.

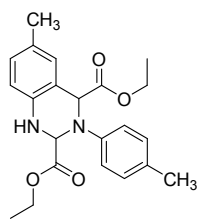

**7b**, <sup>1</sup>H NMR (600 MHz, CDCl<sub>3</sub>): δ = 1.09 (t, *J* = 7.1 Hz, 3H), 1.22 (t, *J* = 7.1 Hz, 3H), 2.25 (s, 6H), 4.06-4.15 (m, 2H), 4.18-4.22 (m, 2H), 4.70 (brs, 1H), 5.15 (s, 1H), 5.63 (s, 1H), 6.66 (d, *J* = 8.0 Hz, 1H), 6.88 (d, *J* = 8.3 Hz, 2H), 6.94 (d, *J* = 7.9 Hz, 1H), 7.03 (d, *J* = 8.2 Hz, 2H), 7.11 (s, 1H); <sup>13</sup>C NMR (150 MHz, CDCl<sub>3</sub>): δ = 14.0, 14.1, 20.5, 20.7, 61.4, 61.5, 62.9, 67.7, 116.6, 118.6, 118.9, 127.9, 129.1, 129.3, 129.7, 131.4, 139.0, 144.8, 170.2, 172.1; HRMS calculated for C<sub>22</sub>H<sub>26</sub>N<sub>2</sub>NaO<sub>4</sub>(ESI): 405.1791; found, 405.1785.

## 5. Copies of NMR spectra for 4a–5i, 7b

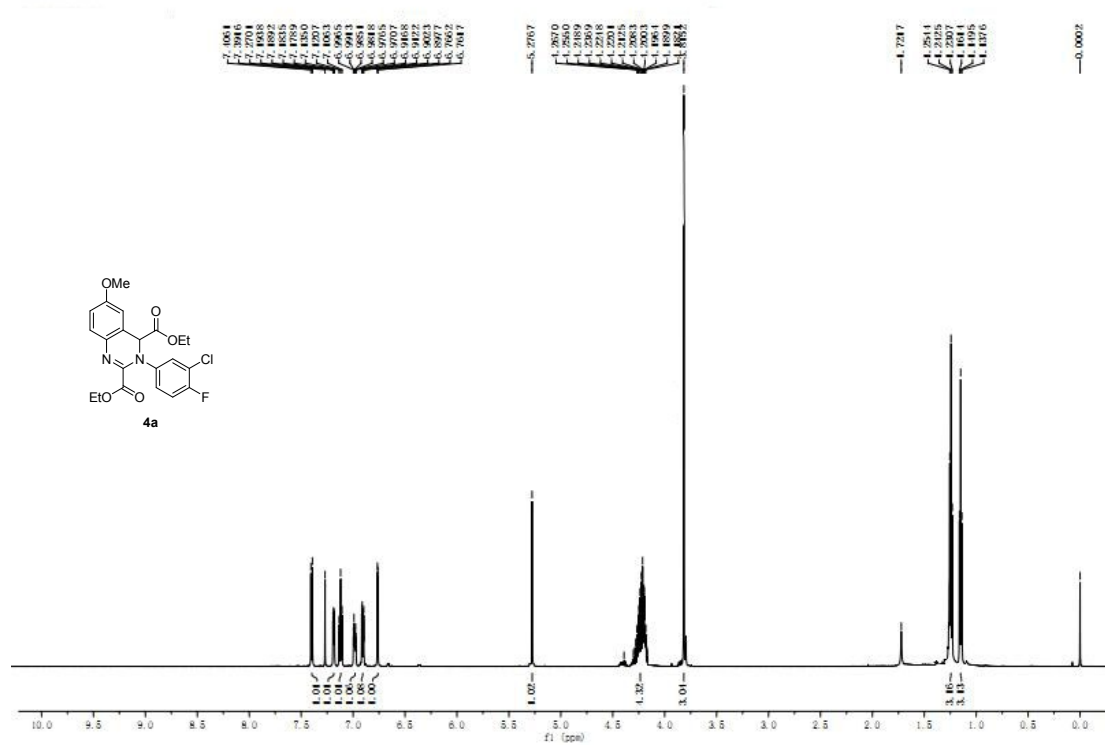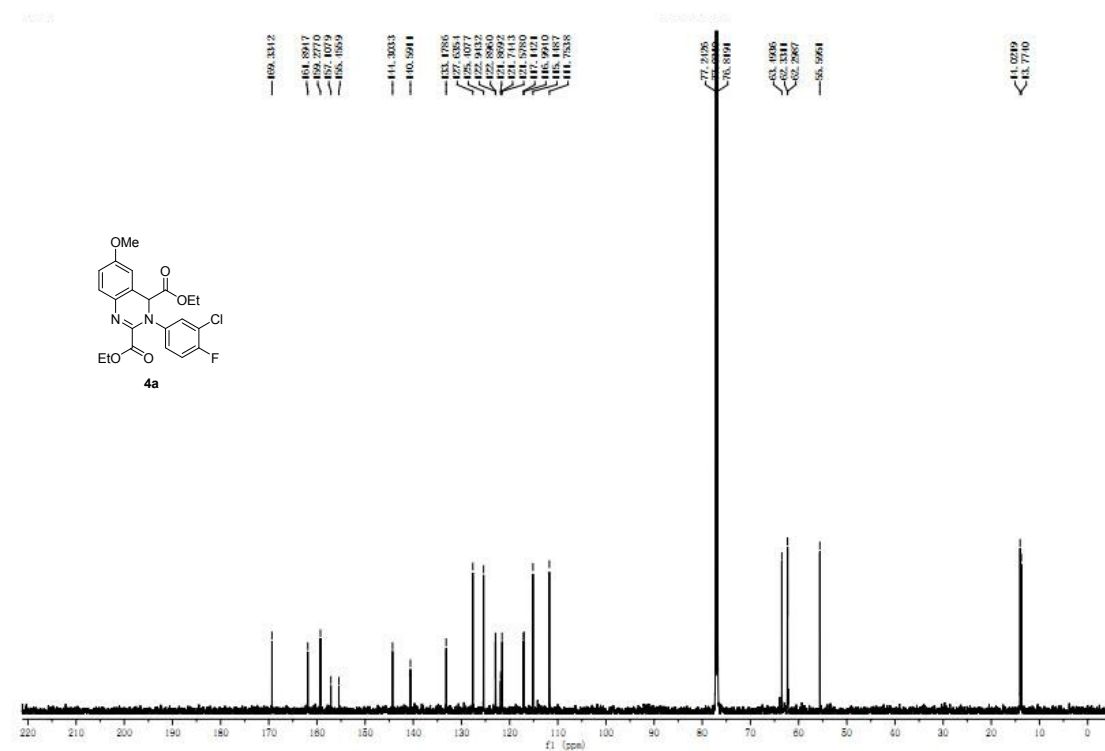

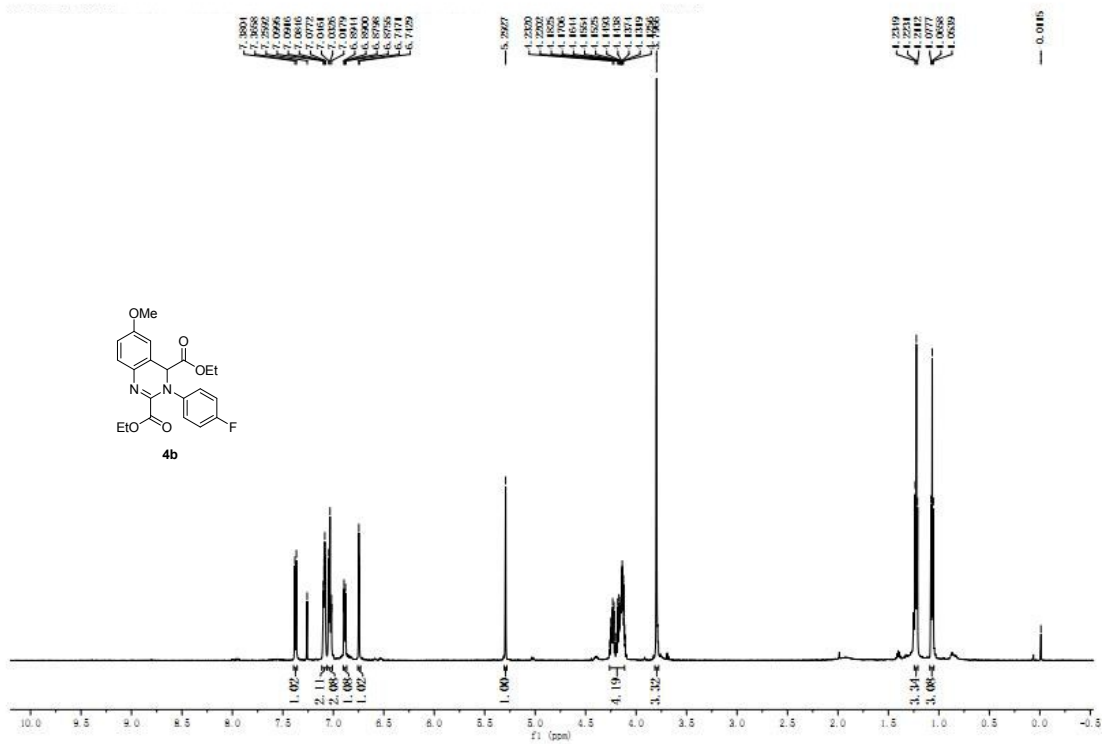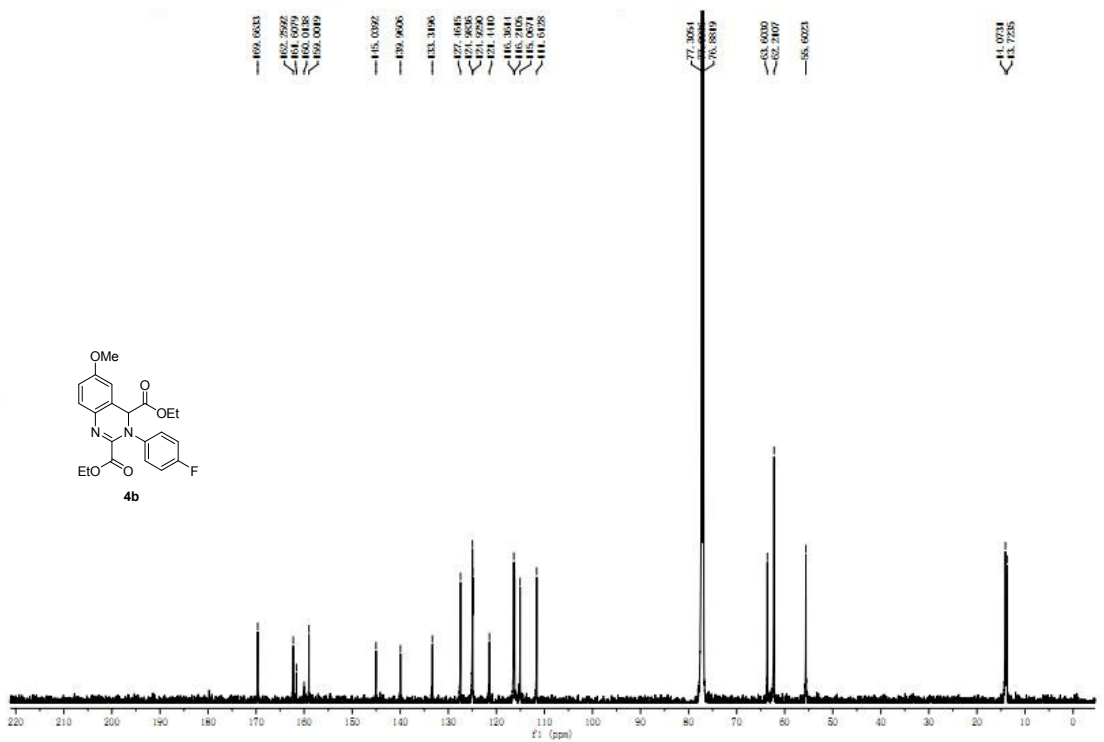



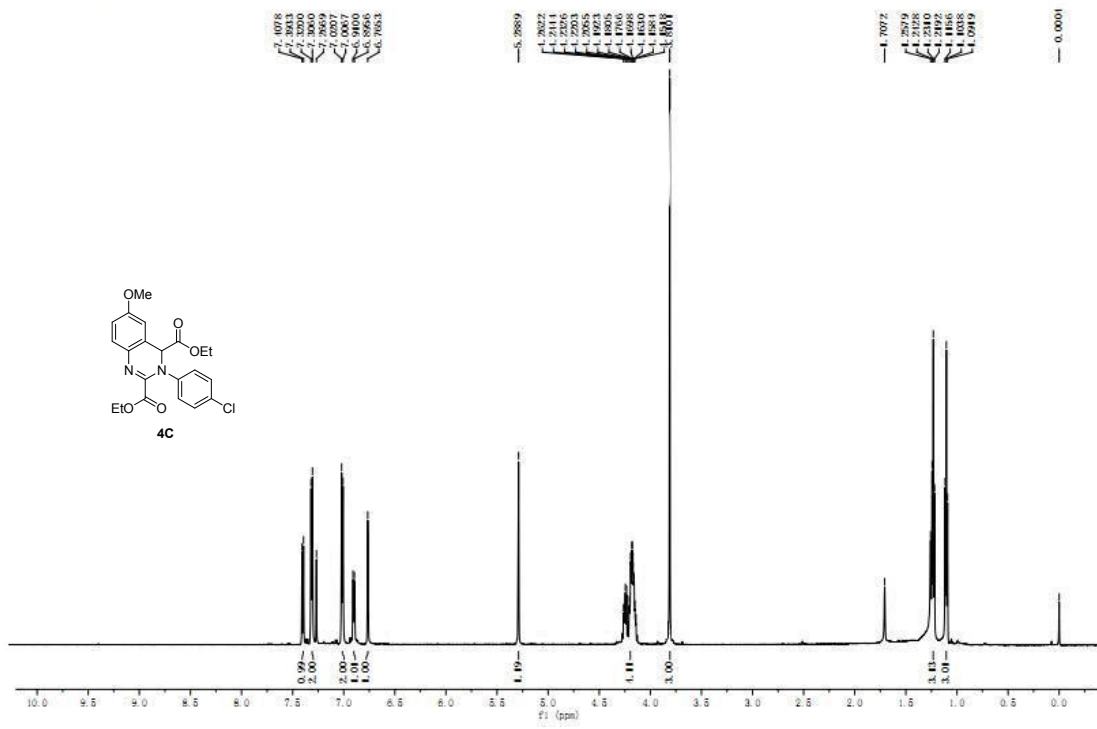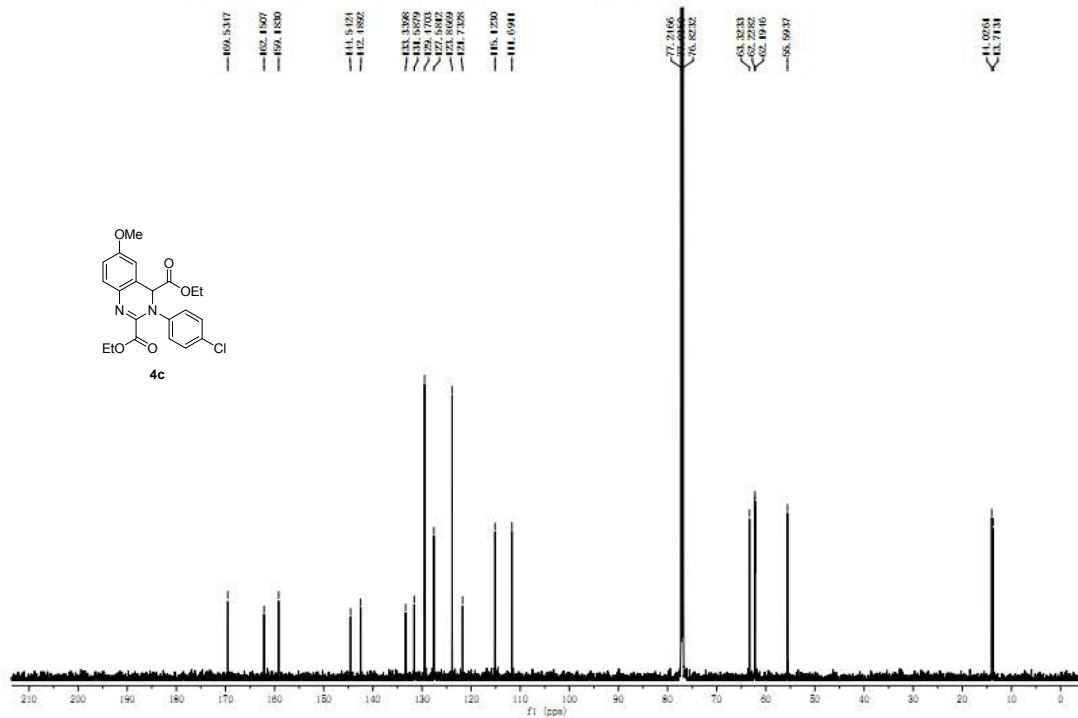

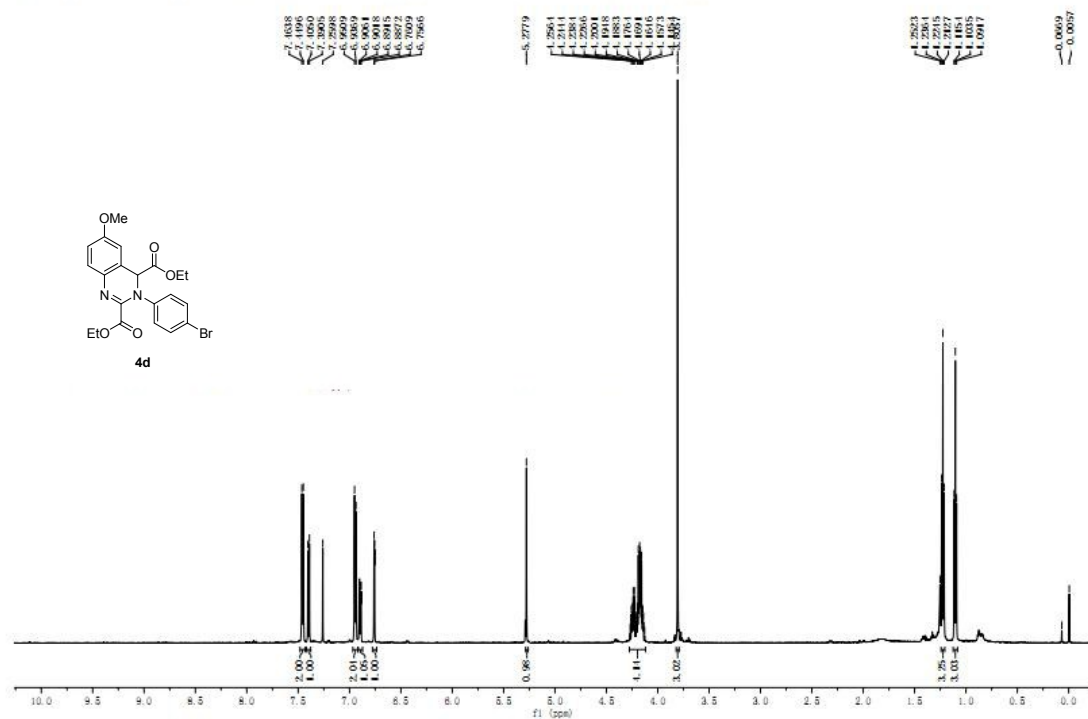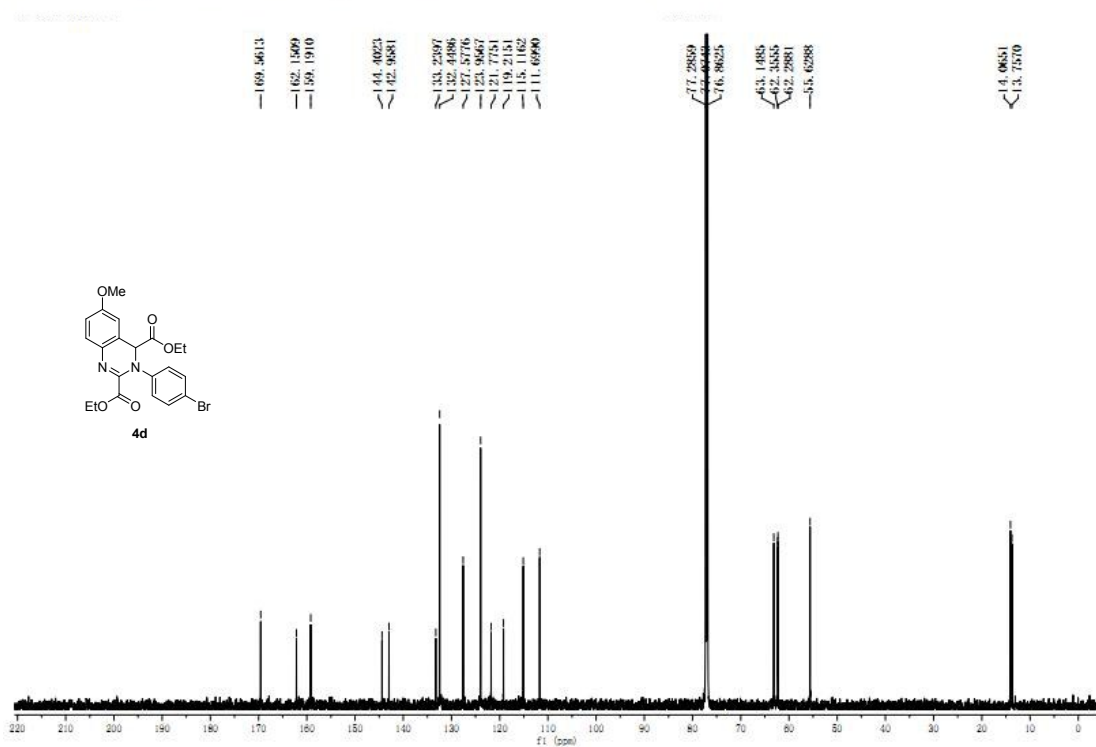

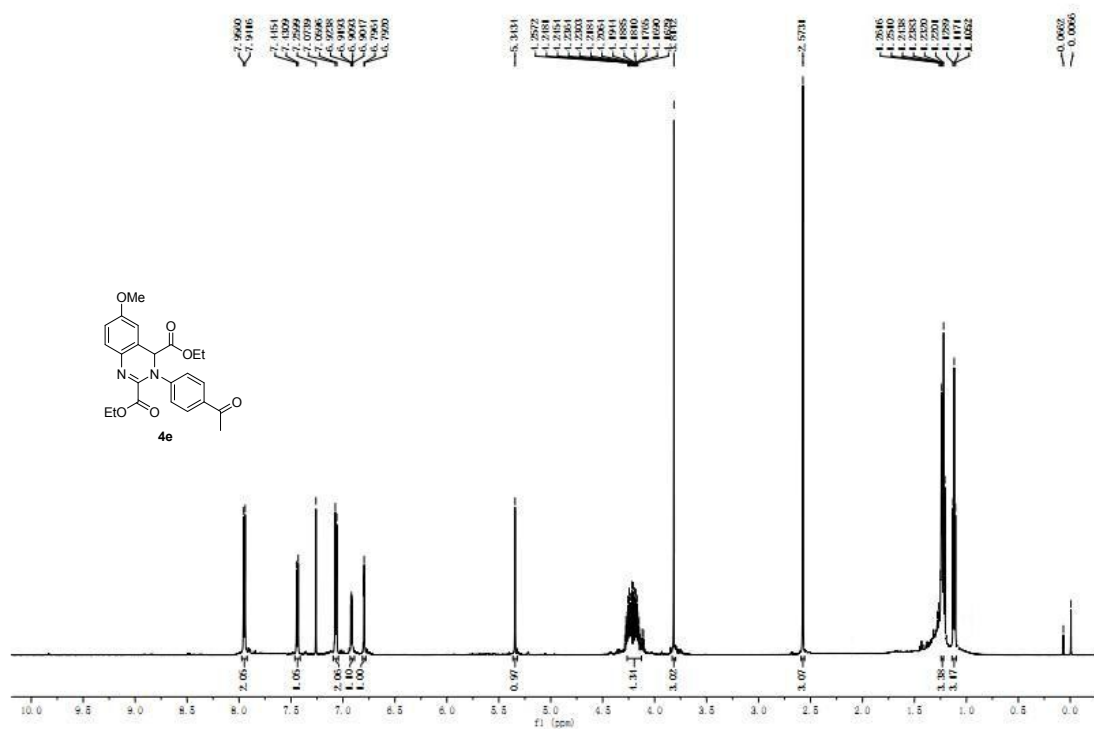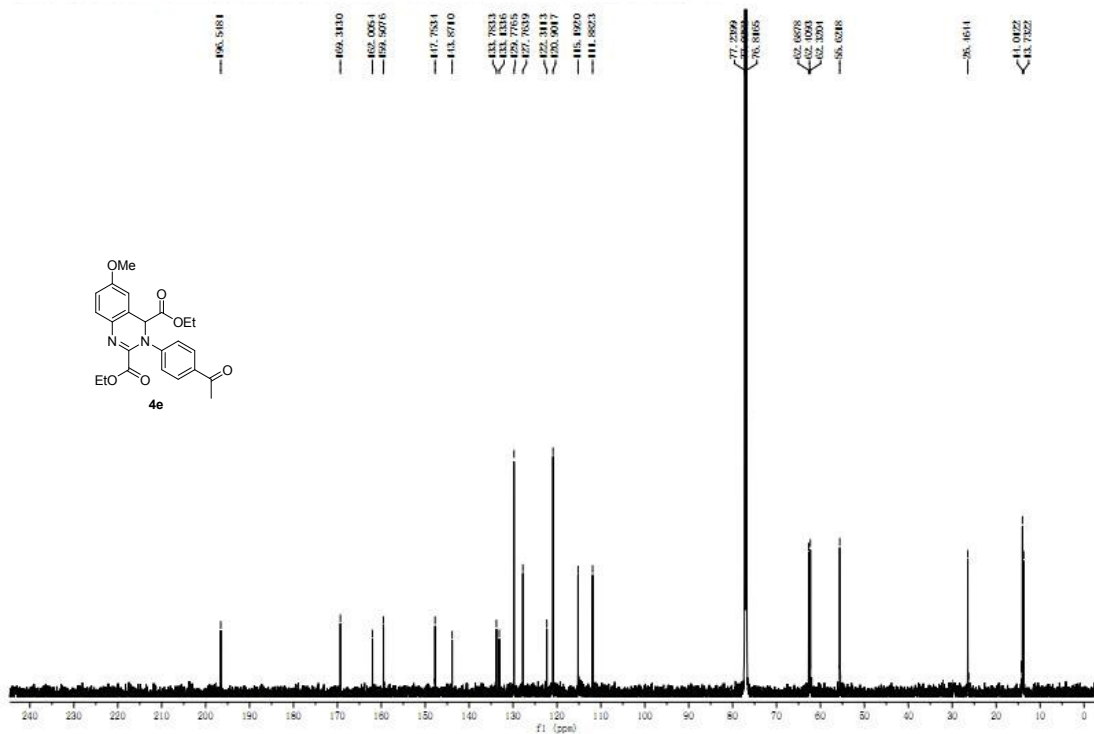

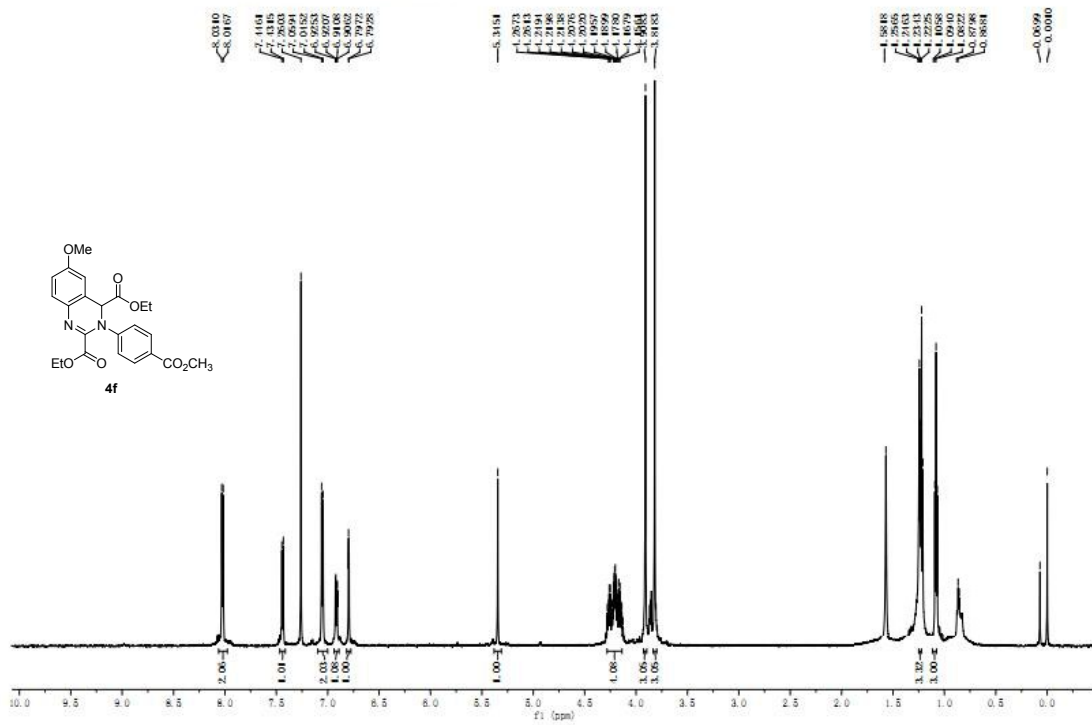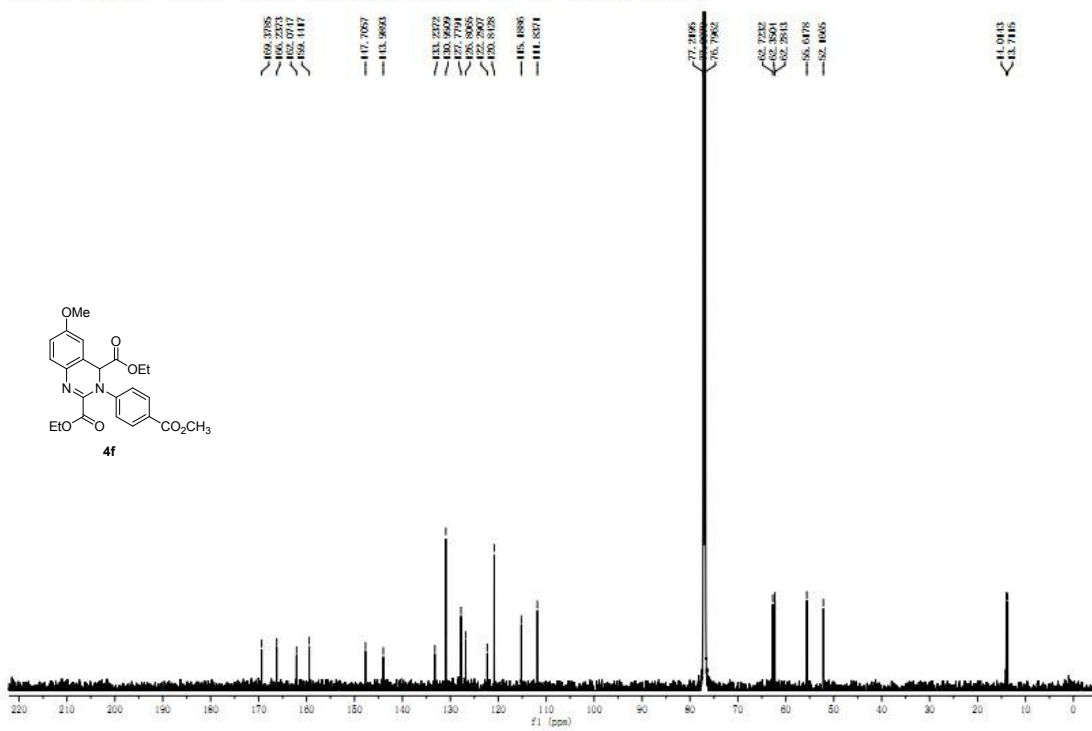

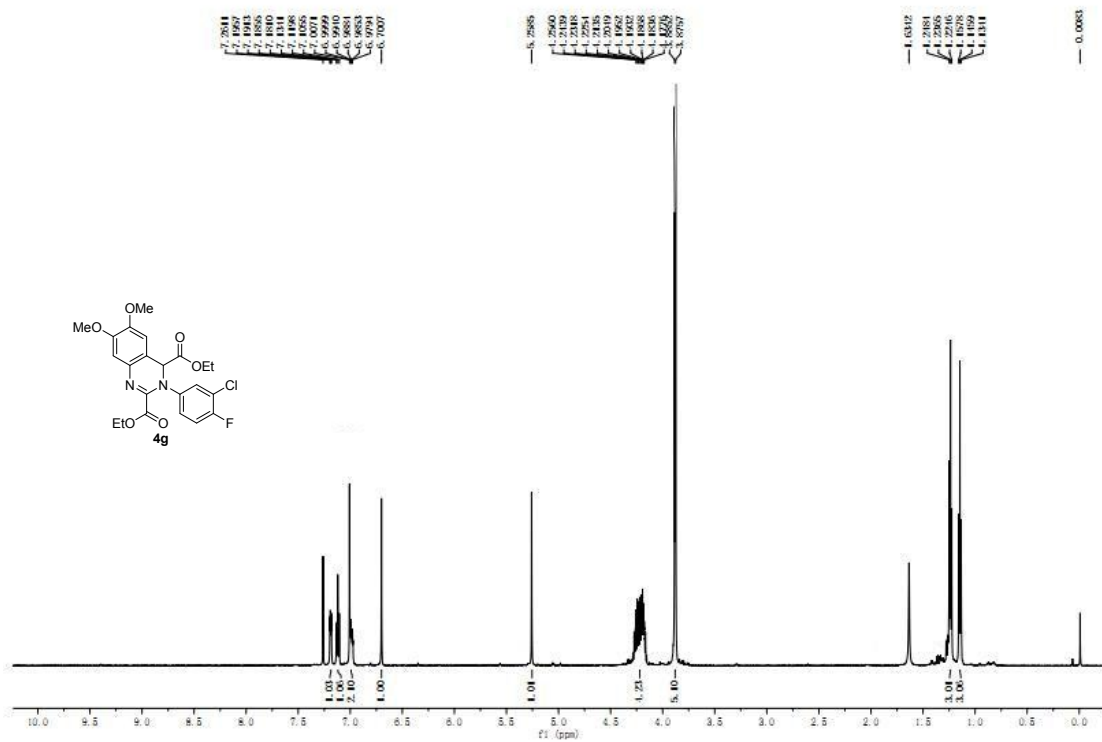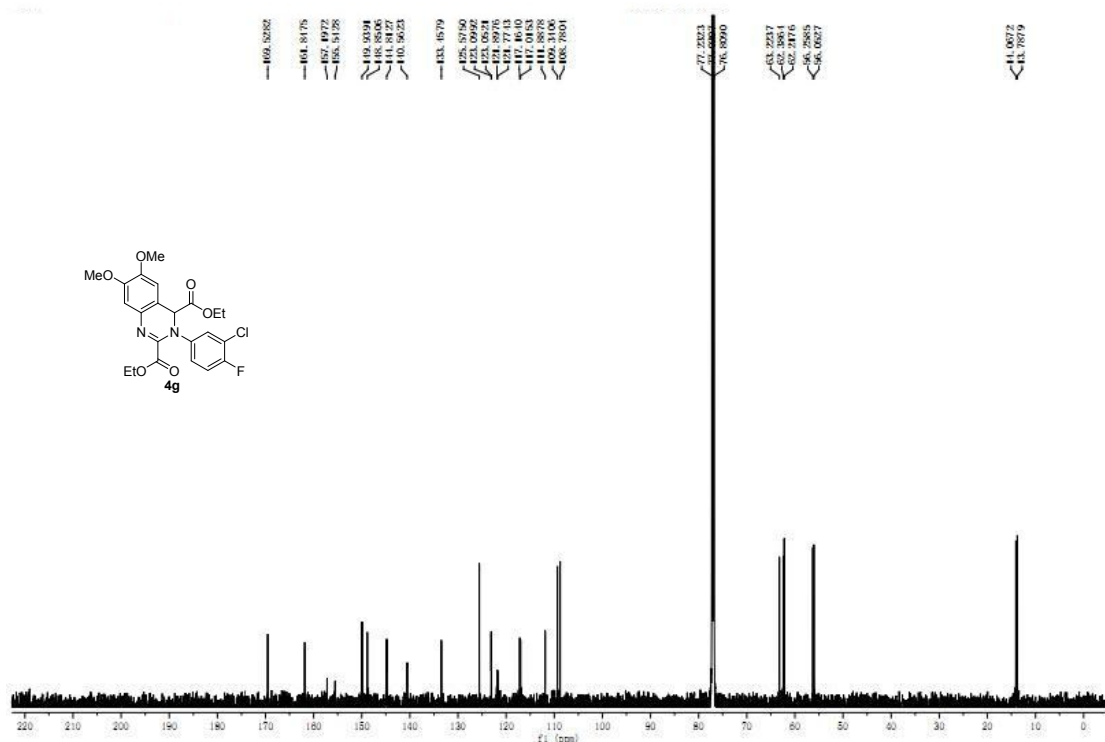



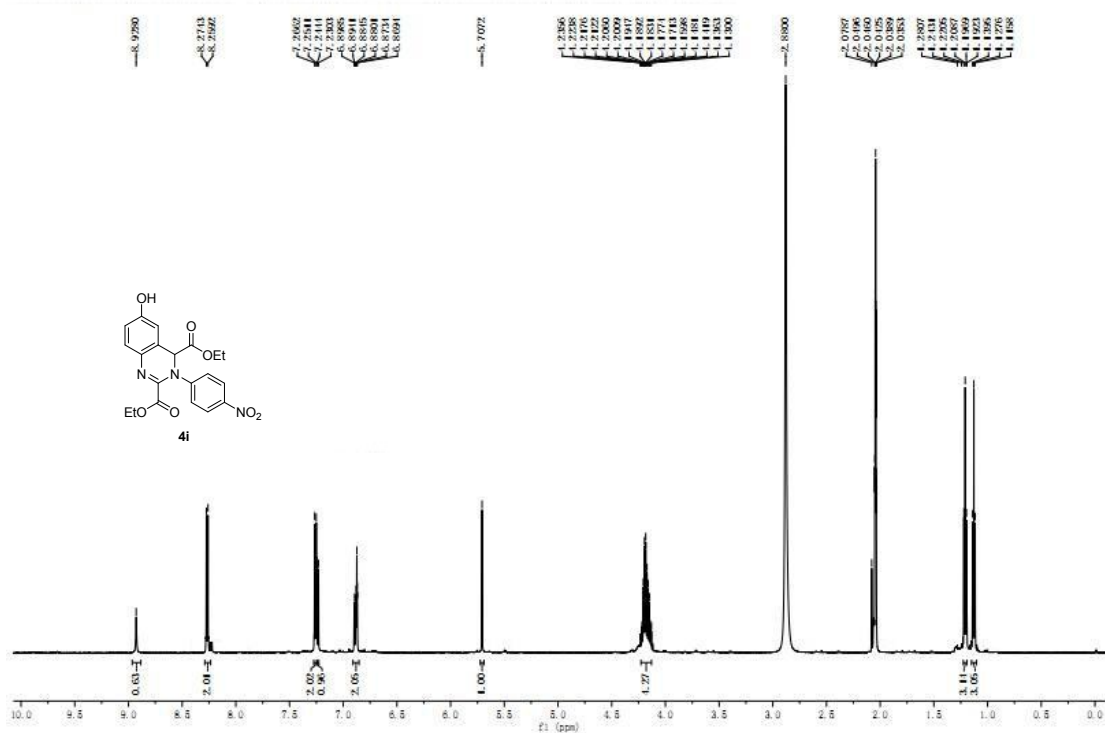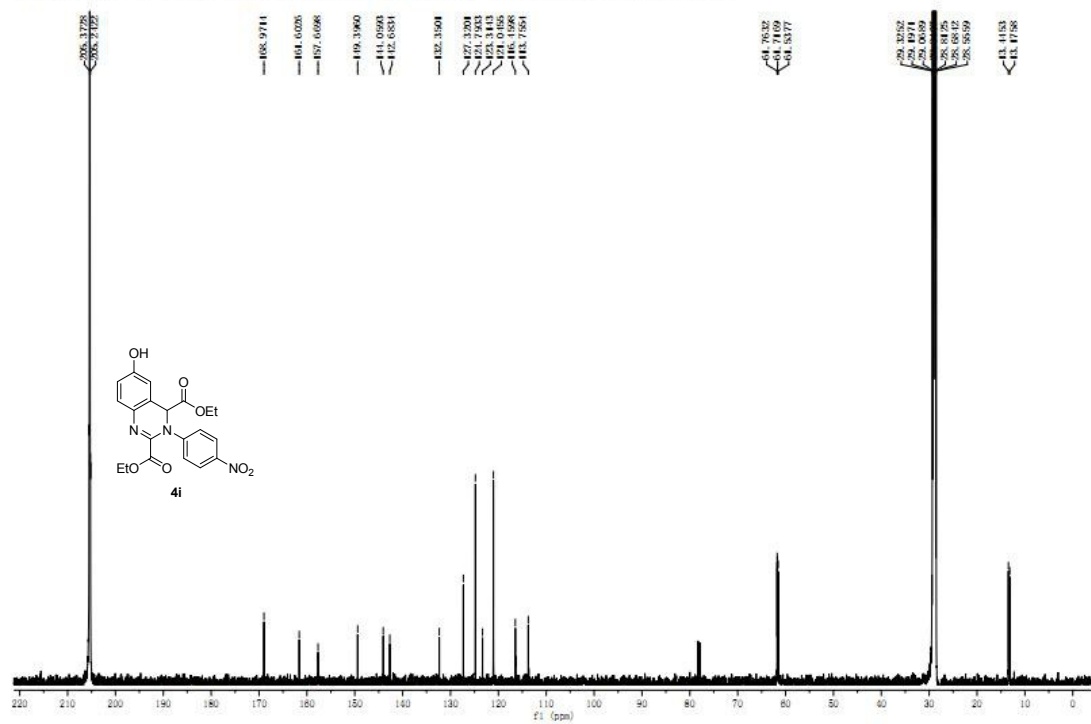





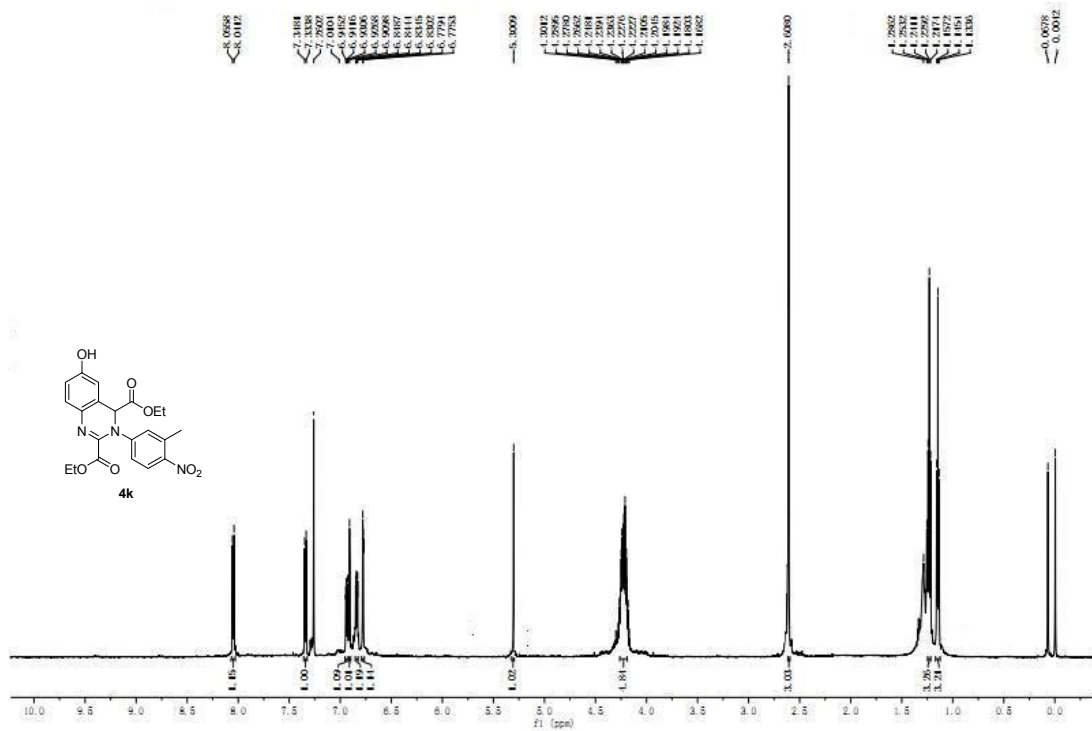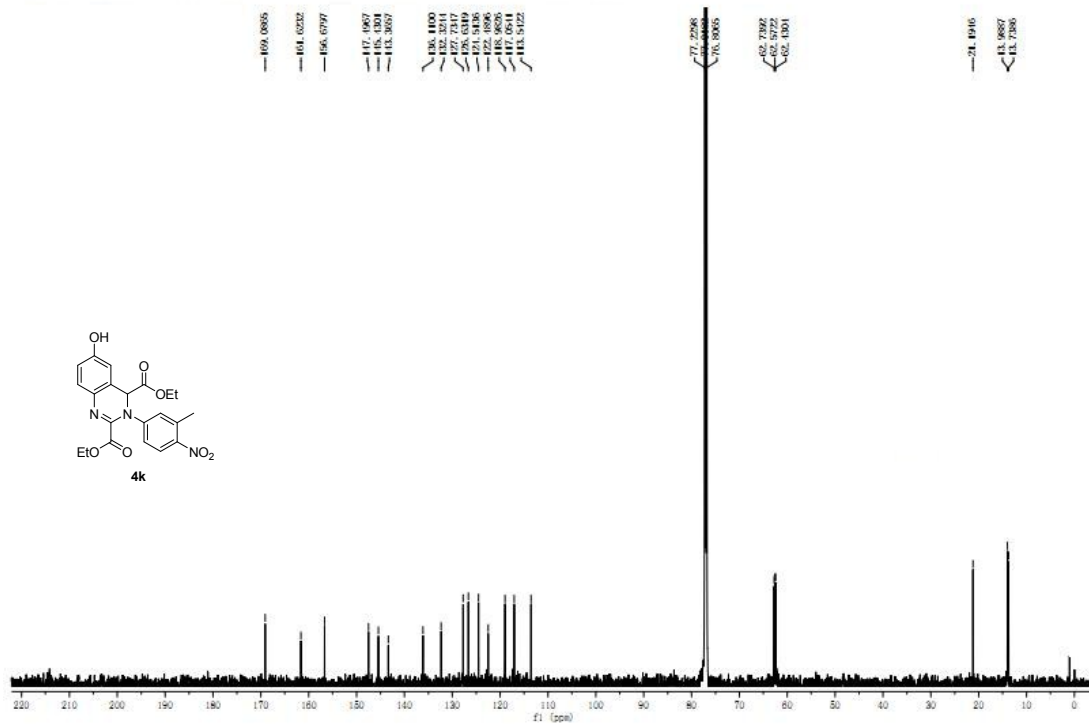

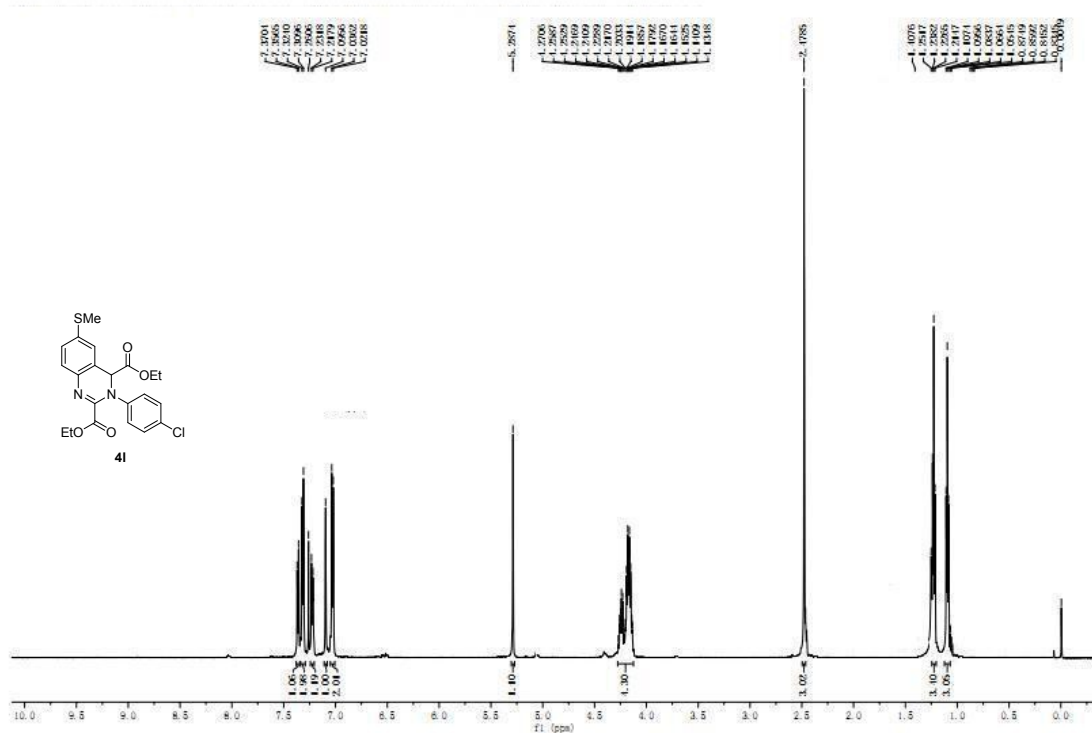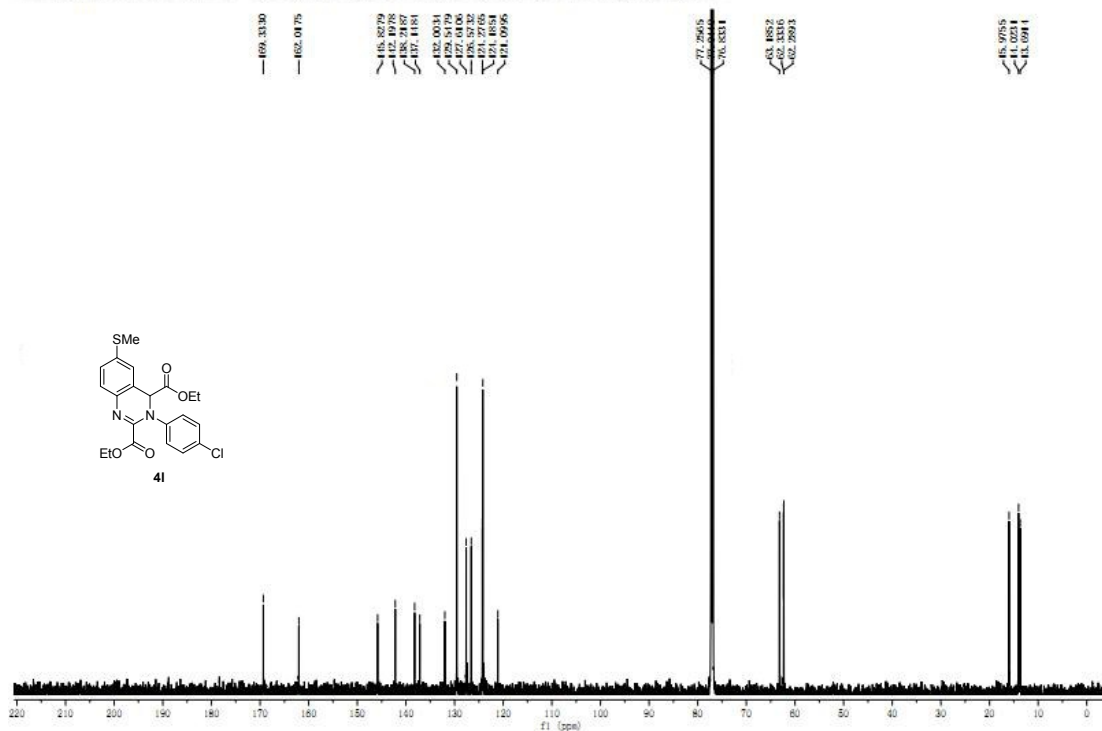

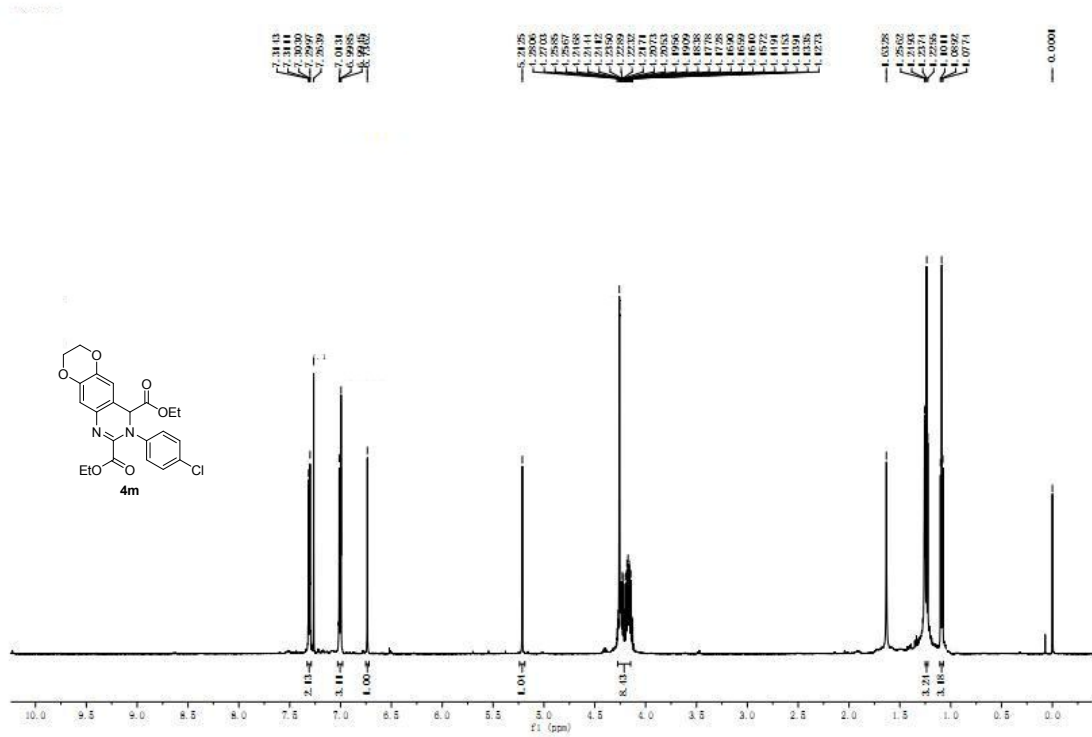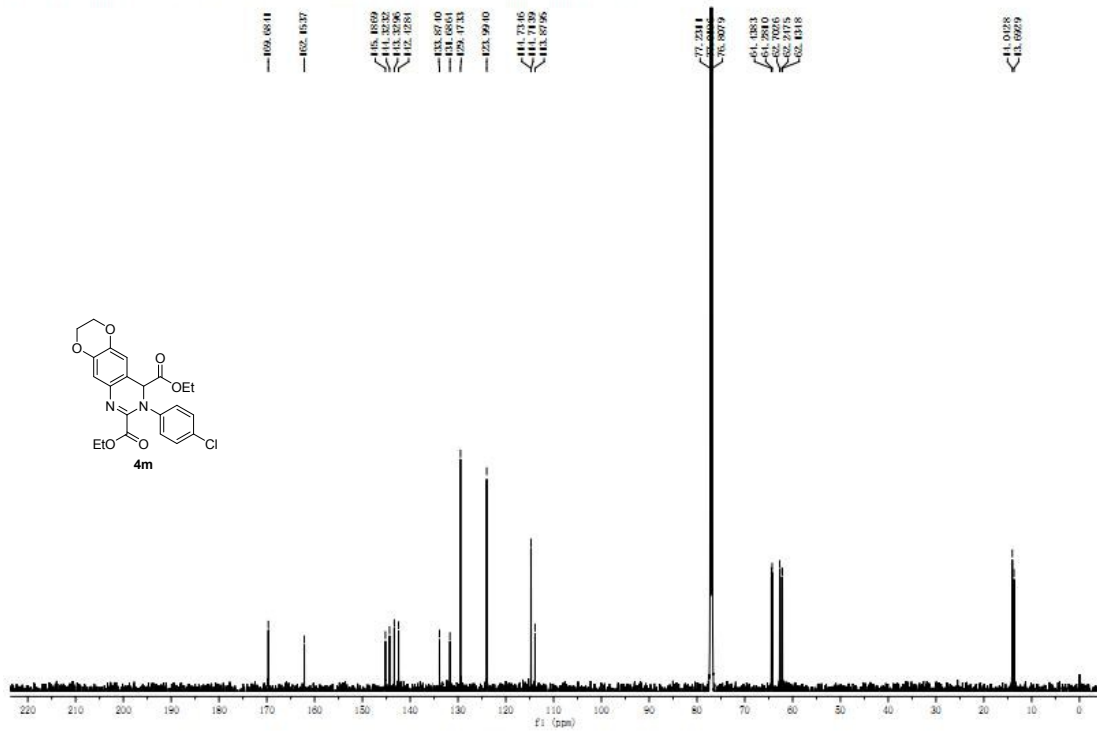



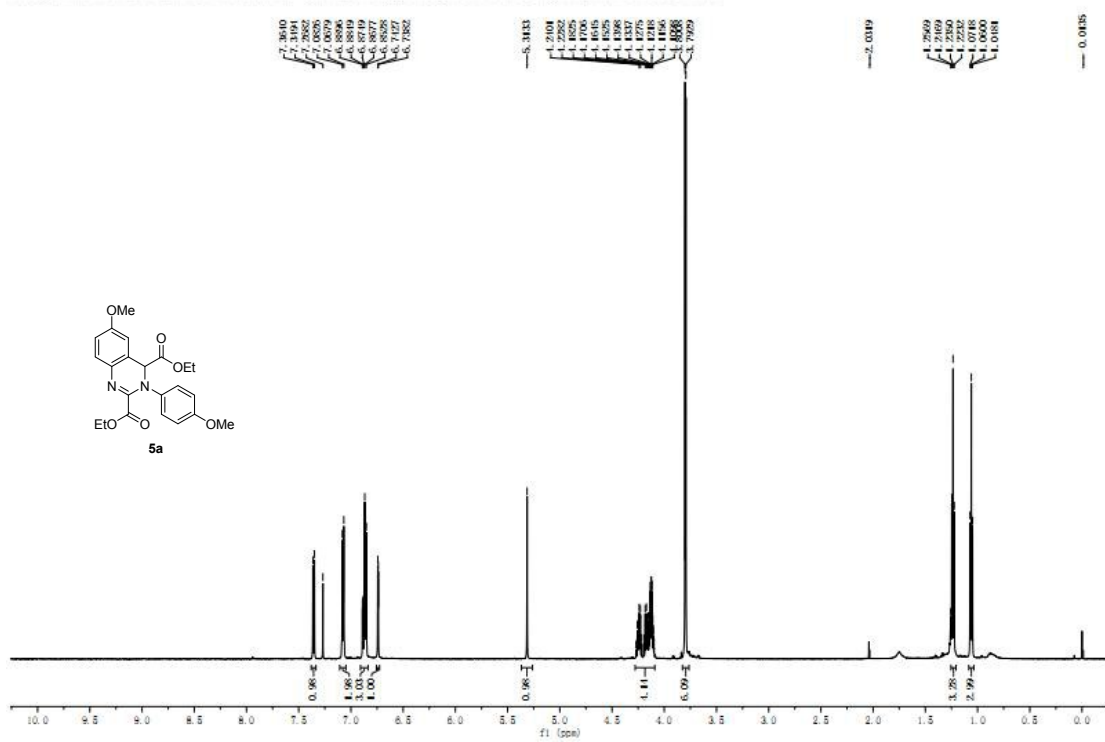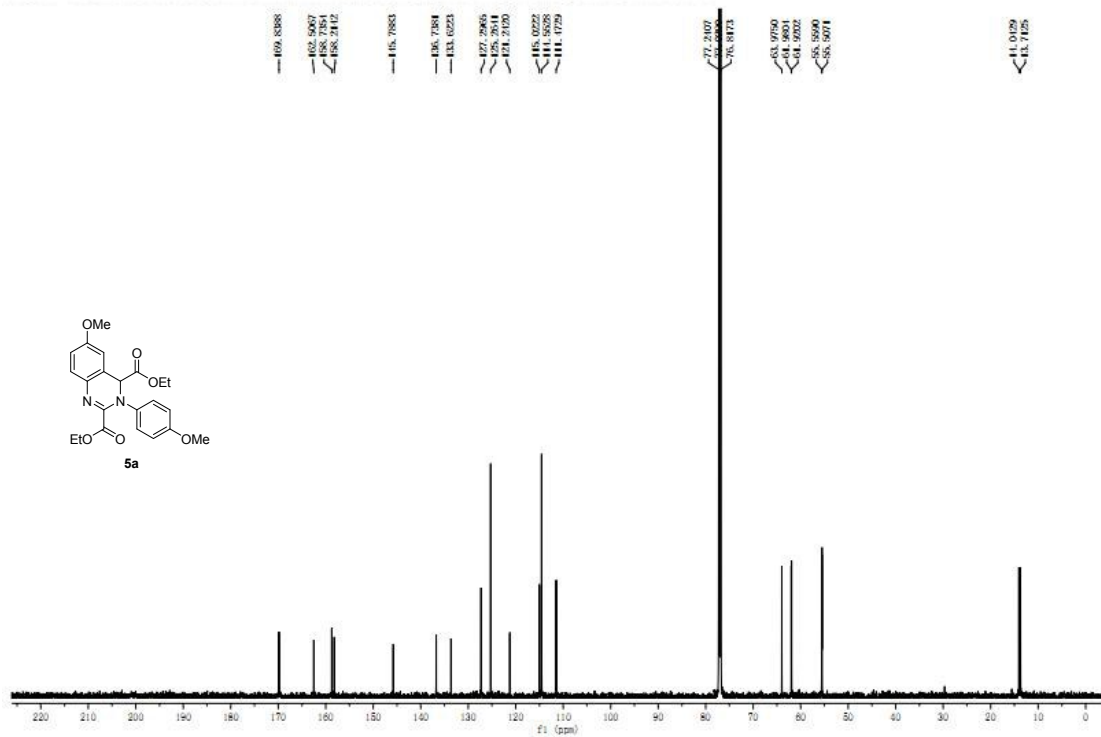

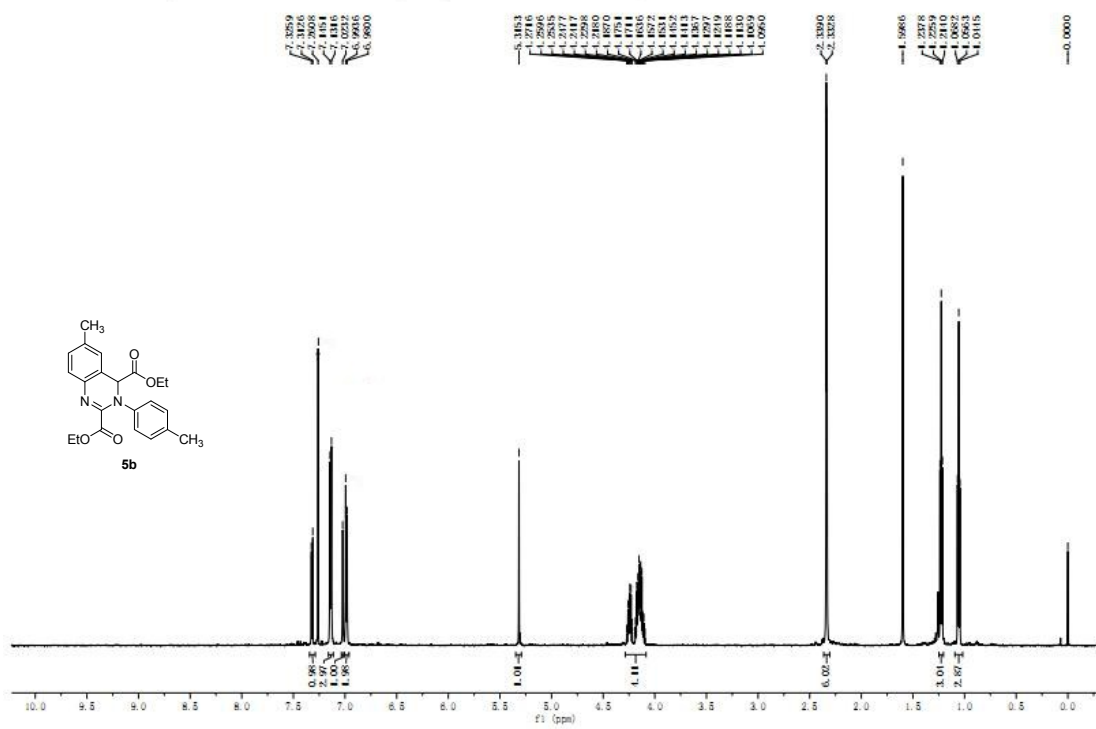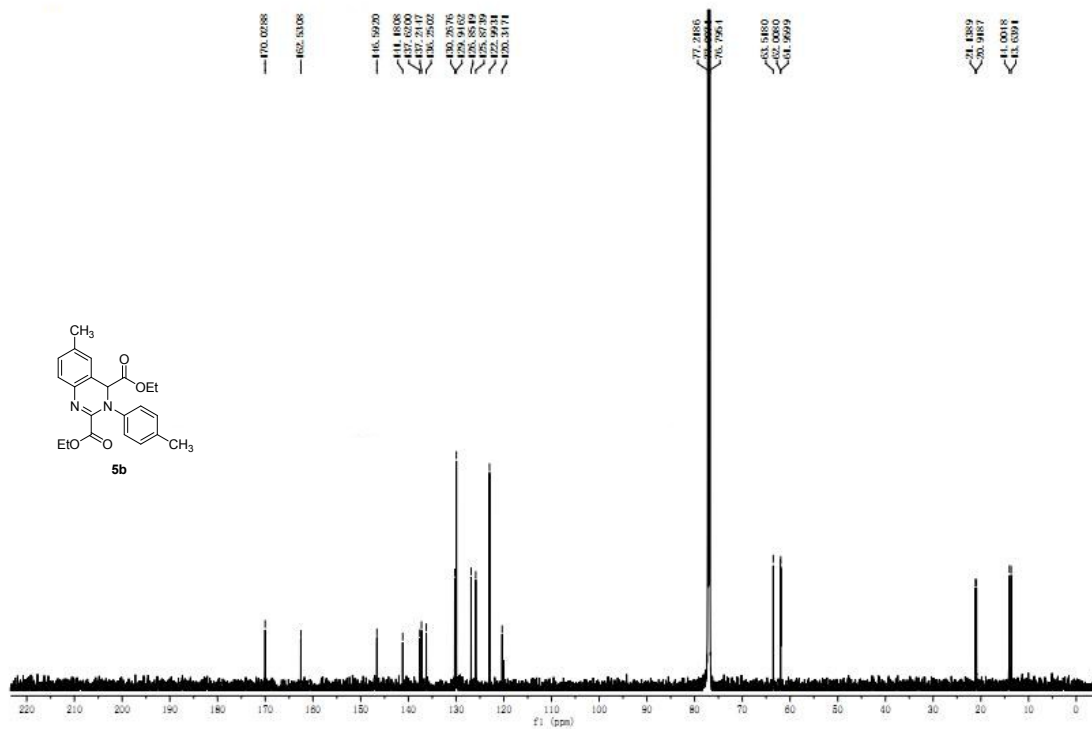



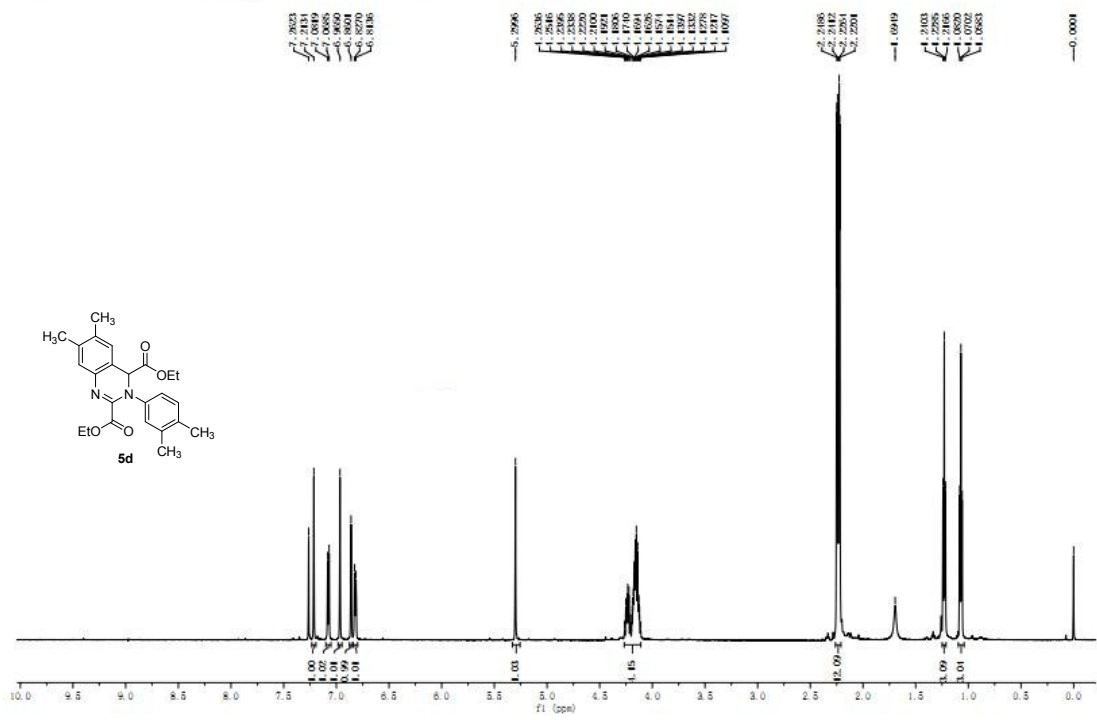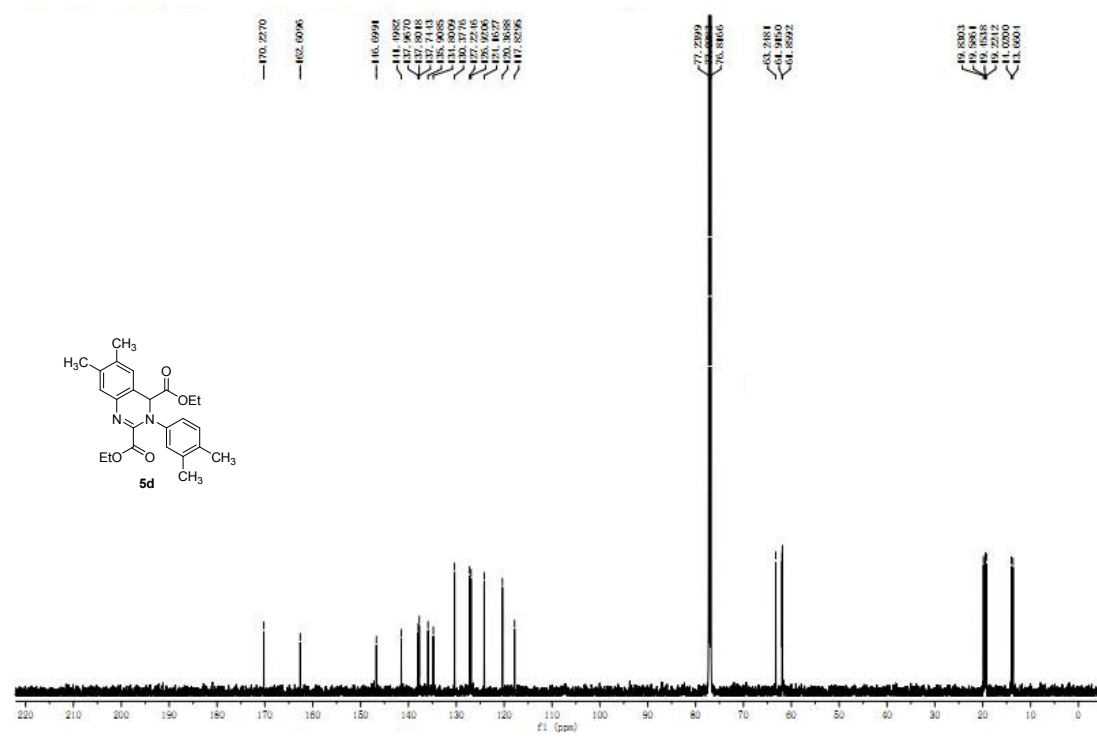









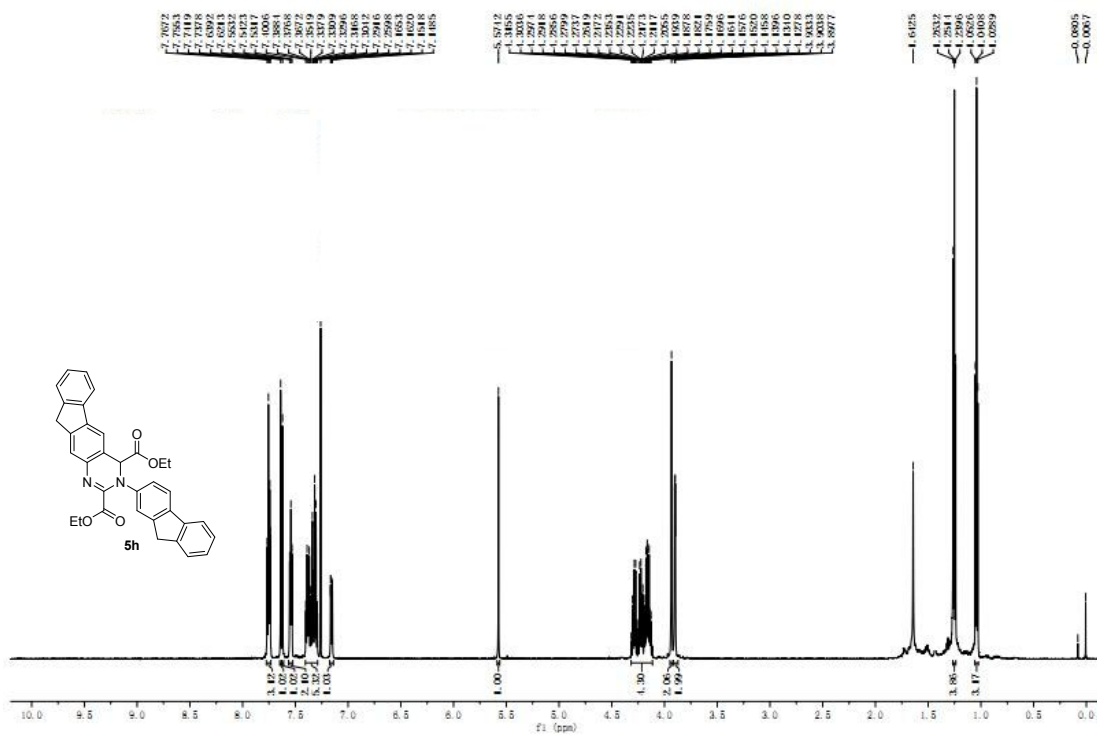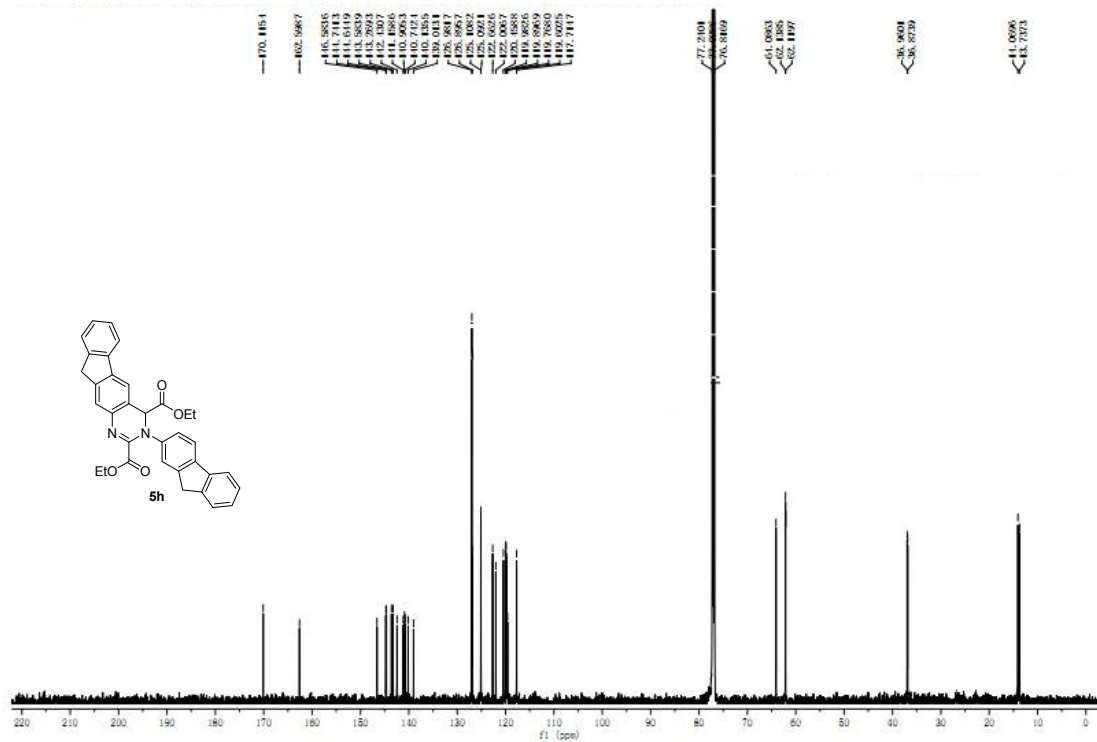



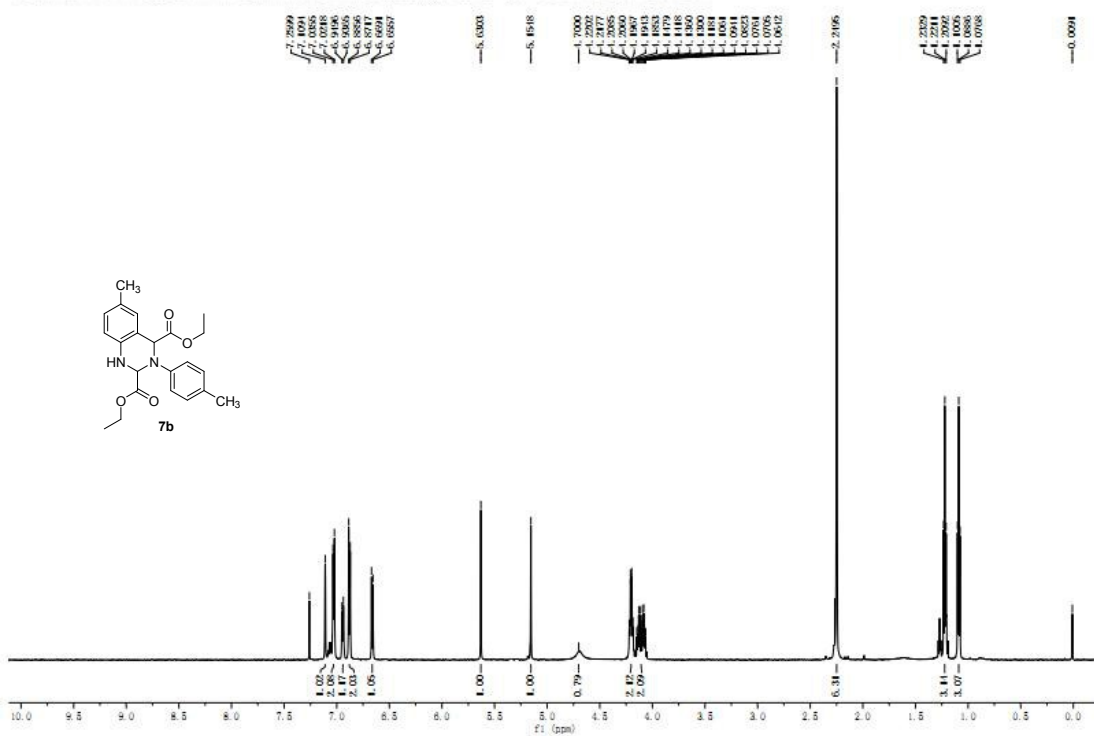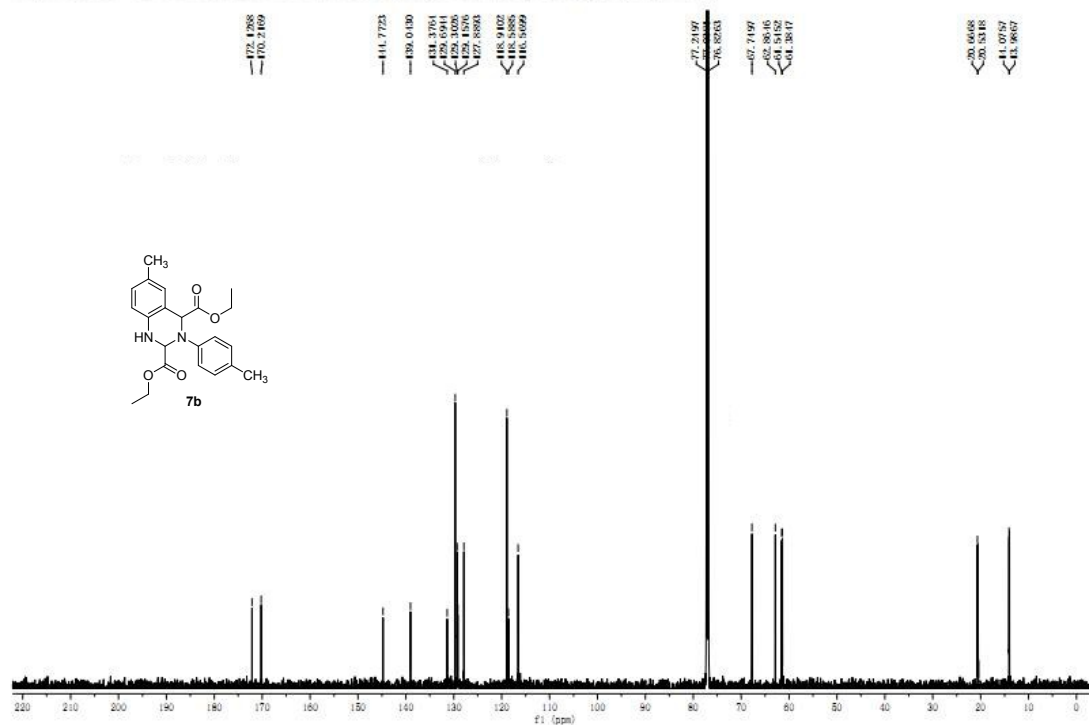

Supplement: c8ob01005f1.pdf [file c8ob01005f1.pdf]
